# Supplementary material for: Discovery of novel chemical scaffolds as RhoA inhibitors using virtual screening, synthesis, and bioactivity evaluation
Source: Royal Society of Chemistry journal article supplement (doi:10.1039/c6ra11398b), 2016-01-01
Supplement: c6ra11398b1.pdf [file c6ra11398b1.pdf]

## Supporting Information

### Discovery of novel chemical scaffolds as RhoA inhibitors using virtual screening, synthesis, and bioactivity evaluation

Chao Zhang,<sup>ab</sup> Hui-Jie Wang,<sup>ab</sup> Qi-Chao Bao,<sup>ab</sup> Jin-Lei Bian,<sup>ab</sup> Ying-Rui Yang,<sup>ab</sup>  
Qi-Dong You<sup>\*abc</sup> and Xiao-Li Xu,<sup>\*abc</sup>

<sup>a</sup>Jiangsu Key Laboratory of Drug Design and Optimization, China Pharmaceutical University, Nanjing, 210009, China.

<sup>b</sup>State Key Laboratory of Natural Medicines, China Pharmaceutical University, Nanjing, 210009, China

<sup>c</sup>Department of Medicinal Chemistry, School of Pharmacy, China Pharmaceutical University, Nanjing, 210009, China

\*Corresponding authors

E-mail addresses:

youqd@163.com (Q. You)

xuxiao\_li@163.com (X. Xu)

## Chemical synthesis and analytical data

### Reagents and methods

All reagents were purchased from commercial sources. Organic solutions were concentrated in a rotary evaporator (BüchiRotavapor) below 55 °C under reduced pressure. Reactions were monitored by thin-layer chromatography (TLC) on 0.25 mm silica gel plates (GF254) and visualized under UV light. Melting points were determined with a Melt-Temp II apparatus. The <sup>1</sup>H NMR and <sup>13</sup>C NMR spectra were measured on a Bruker AV-300 instrument using deuterated solvents with tetramethylsilane (TMS) as internal standard. EI-MS was collected on shimadzu GCMS-2010 instruments. ESI-mass and high resolution mass spectra (HRMS) were recorded on a Water Q-Tofmicro mass spectrometer. Analytical results are within 0.40% of the theoretical values. The purity (≥95%) of the compounds is verified by the HPLC study performed on Agilent C18 (4.6 mm × 150 mm, 3.5 μm) column using a mixture of solvent methanol/water with bits of trifluoroacetic acid at a flow rate of 0.5 mL/min and peak detection at 254 nm under UV. Some of our derived compounds may exist enantiomers.

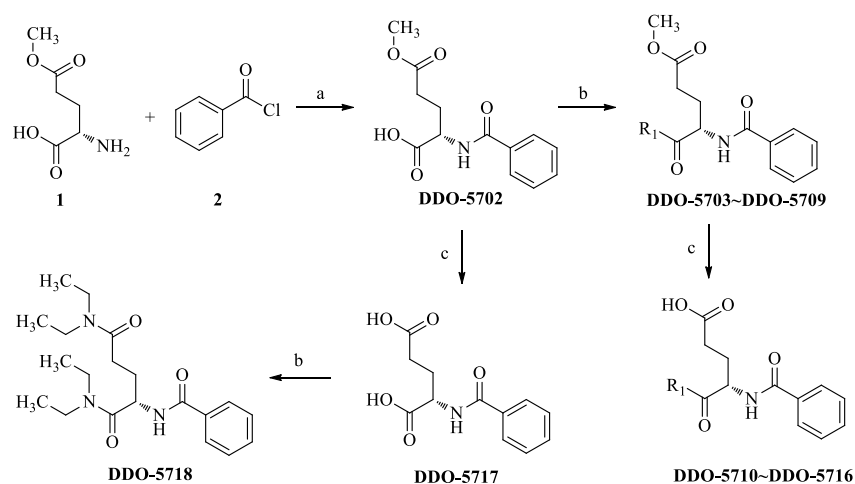

**2-Benzamido-5-methoxy-5-oxopentanoic acid (DDO-5702).** To a stirred mixture of **1** (4.0 g, 24.8 mmol) and sodium bicarbonate (5.2 g, 62.0 mmol) in diethyl ether/H<sub>2</sub>O (v:v = 1:1) was added dropwise benzoyl chloride **2** (5.2 g, 37.2 mmol) at 0 °C. The mixture was stirred overnight at room temperature. The reaction mixture was acidizing with hydrochloric acid. Then, the mixture was extracted with EtOAc and the combined organic layer was washed with brine and dried over anhydrous Na<sub>2</sub>SO<sub>4</sub>, filtered and concentrated to afford a crude product which was recrystallized from diethyl ether to give the titled compound as a white solid (5.6 g, 85.1%). M.p.150-152 °C. <sup>1</sup>HNMR (300 MHz, CDCl<sub>3</sub>) δ 7.78 (d, J = 7.2 Hz, 2H, -Ar-H), 7.45-7.59 (m, 4H, -Ar-H, -NH), 4.79-4.80 (m, 1H, -CH), 3.70 (s, 3H, -OCH<sub>3</sub>), 2.56-2.67 (m, 2H, -CH<sub>2</sub>), 2.23-2.39 (m, 2H, -CH<sub>2</sub>); HRMS (ESI): calcd. for C<sub>13</sub>H<sub>15</sub>NO<sub>5</sub> [M + H]<sup>+</sup> 266.1023, found 266.1026. HPLC (80% methanol in water): t<sub>R</sub> = 2.77 min, 98.83%.

**General procedure for preparation of DDO-5703~DDO-5709.** To a stirred solution of DDO-5702 (0.3 g, 1.13 mmol) in dry dichloromethane (15 mL) was added 1-ethyl-3-(3-dimethylaminopropyl)carbodiimide hydrochloride (EDCI, 0.43 g, 2.26 mmol)

and 1-hydroxybenzotriazole (HOBT, 0.36 g, 2.26 mmol) at room temperature for 1 h. Then amines (1.70mmol) was added and stirred overnight at room temperature. The mixture was poured into ice water and extracted with EtOAc. The combined organic layer was washed with NaHCO<sub>3</sub> solution and brine solution, dried over Na<sub>2</sub>SO<sub>4</sub>, and concentrated under vacuum. The residue was purified by silica gel column chromatography to afford products.

**Methyl 4-benzamido-5-(diethylamino)-5-oxopentanoate (DDO-5703).** Yield: 69%. M.p. 106-108 °C. <sup>1</sup>HNMR(300 MHz, CDCl<sub>3</sub>) δ 7.83 (d, J = 6.96 Hz, 2H, -Ar-H), 7.31-7.52(m, 1H, -Ar-H), 7.29-7.31(m, 2H, -Ar-H), 5.17-5.18(m, 1H, -CH), 3.61(s, 3H, -OCH<sub>3</sub>), 3.27-3.48(m, 4H, -CH<sub>2</sub>), 2.45-2.52(m, 2H, -CH<sub>2</sub>), 2.06(m, 2H, -CH<sub>2</sub>), 1.31(t, J = 7.14 Hz, 3H, -CH<sub>3</sub>), 1.16(t, J = 7.12Hz, 3H, -CH<sub>3</sub>); <sup>13</sup>CNMR (75 MHz, DMSO) δ 172.97, 170.28, 166.22, 133.76, 131.33, 127.47, 51.31, 48.56, 40.97, 29.59, 26.62, 14.20, 12.85; HRMS (ESI): calcd. for C<sub>17</sub>H<sub>24</sub>N<sub>2</sub>O<sub>4</sub> [M + H]<sup>+</sup> 321.1809, found 321.1808. HPLC (80% methanol in water): t<sub>R</sub> = 4.12 min, 99.37%.

**Methyl 4-benzamido-5-(ethylamino)-5-oxopentanoate (DDO-5704).** Yield: 72.15%. M.p.:129-131 °C. <sup>1</sup>HNMR(300 MHz, DMSO) δ 8.43 (d, J = 6.96 Hz, 1H, -NH), 7.87-7.97(m, 3H, -Ar-H), 7.43-7.53(m, 3H, -Ar-H), 4.37(d, J = 7.68 Hz, 1H, -CH), 3.56(d, J = 2.7 Hz, 3H, -OCH<sub>3</sub>), 3.05-3.09(m, 2H, -CH<sub>2</sub>), 2.34-2.49(m, 2H, -CH<sub>2</sub>), 1.92-2.02(m, 2H, -CH<sub>2</sub>), 0.98-1.01(m, 3H, -CH<sub>3</sub>); HRMS (ESI): calcd. for C<sub>15</sub>H<sub>20</sub>N<sub>2</sub>O<sub>4</sub> [M + H]<sup>+</sup> 293.1496, found 293.1494. HPLC (80% methanol in water): t<sub>R</sub> = 3.65 min, 98.38%.

**Methyl 4-benzamido-5-(dimethylamino)-5-oxopentanoate (DDO-5705).** Yield: 63.52%. M.p.:112-114 °C. <sup>1</sup>HNMR(300 MHz, CDCl<sub>3</sub>) δ 7.82(d, J = 7.05 Hz, 2H, -Ar-H), 7.41-7.53(m, 1H, -Ar-H), 7.26(d, J = 4.86 Hz, 2H, -Ar-H), 5.19-5.26(m, 1H, -CH), 3.69(s, 3H, -OCH<sub>3</sub>), 3.22(s, 3H, -CH<sub>3</sub>), 3.00(s, 3H, -CH<sub>3</sub>), 2.84(s, 3H, -CH<sub>3</sub>), 2.43-2.54(m, 2H, -CH<sub>2</sub>), 2.19-2.26(m, 1H, -CH<sub>2</sub>), 1.74-1.92(m, 1H, -CH<sub>2</sub>); HRMS (ESI): calcd. for C<sub>15</sub>H<sub>20</sub>N<sub>2</sub>O<sub>4</sub> [M + H]<sup>+</sup> 293.1496, found 293.1497. HPLC (80% methanol in water): t<sub>R</sub> = 3.62 min, 99.28%.

**Methyl 4-benzamido-5-oxo-5-(piperidin-1-yl)pentanoate (DDO-5706).** Yield: 66.5%. M.p.:108-110 °C. <sup>1</sup>HNMR(300 MHz, DMSO) δ 8.57(d, J = 7.02 Hz, 1H, -NH), 7.87 (d, J = 7.14 Hz, 2H, -Ar-H), 7.45-7.53(m, 3H, -Ar-H), 4.92(s, 1H, -CH), 3.81(s, 3H, -CH<sub>3</sub>), 3.33-3.57(m, 4H, -CH<sub>2</sub>), 2.38-2.71(m, 2H, -CH<sub>2</sub>), 1.88-1.93(m, 2H, -CH<sub>2</sub>), 1.44-1.56(m, 6H, -CH<sub>2</sub>); HRMS (ESI): calcd. for C<sub>18</sub>H<sub>24</sub>N<sub>2</sub>O<sub>4</sub> [M + H]<sup>+</sup> 333.1809, found 333.181. HPLC (80% methanol in water): t<sub>R</sub> = 4.33 min, 99.39%.

**Methyl 4-benzamido-5-((4-bromophenyl)amino)-5-oxopentanoate (DDO-5707).** Yield: 73.81%. M.p.:156-157 °C. <sup>1</sup>HNMR(300 MHz, DMSO) δ 10.26(s, 1H, -NH), 8.66(d, J = 7.26 Hz, 1H, -NH), 7.89 (d, J = 6.90 Hz, 2H, -Ar-H), 7.47-7.60(m, 7H, -Ar-H), 4.54 (dd, J = 7.68 Hz, 1H, -CH), 3.56(s, 3H, -OCH<sub>3</sub>), 2.48-2.50(m, 2H, -CH<sub>2</sub>), 2.03-2.13(m, 2H, -CH<sub>2</sub>); HRMS (ESI): calcd. for C<sub>19</sub>H<sub>19</sub>BrN<sub>2</sub>O<sub>4</sub> [M + H]<sup>+</sup> 419.0601, found 419.0596. HPLC (80% methanol in water): t<sub>R</sub> = 6.14 min, 99.59%.

**Methyl 4-benzamido-5-((4-chlorophenyl)amino)-5-oxopentanoate (DDO-5708).** Yield: 73.13%. M.p.:150-152 °C. <sup>1</sup>HNMR(300 MHz, DMSO) δ 10.26(s, 1H, -NH), 8.65(d, J = 7.44 Hz, 1H, -NH), 7.90 (d, J = 6.90 Hz, 2H, -Ar-H), 7.64(d, J = 8.82 Hz, 2H, -Ar-H), 7.44-7.55(m, 3H, -Ar-H), 7.36(d, J = 8.79 Hz, 2H, -Ar-H) 4.54(dd, J = 6.75 Hz, 1H, -CH), 3.56(s, 3H, -CH<sub>3</sub>), 2.42-2.49(m, 2H, -CH<sub>2</sub>), 2.06-2.11(m, 2H, -CH<sub>2</sub>); HRMS (ESI): calcd. for C<sub>19</sub>H<sub>19</sub>ClN<sub>2</sub>O<sub>4</sub> [M + H]<sup>+</sup> 375.1106, found 375.1106. HPLC (80% methanol in water): t<sub>R</sub> = 5.73 min, 99.86%.

**Methyl 4-benzamido-5-((4-methoxyphenyl)amino)-5-oxopentanoate (DDO-5709).** Yield:

78.78%. M.p.:139-141 °C. <sup>1</sup>HNMR(300 MHz, DMSO) δ 9.97(s, 1H, -NH), 8.60(d, J = 7.38 Hz, 1H, -NH), 7.90 (d, J = 6.99 Hz, 2H, -Ar-H), 7.44-7.54(m, 5H, -Ar-H), 6.87(d, J = 9.06 Hz, 2H, -Ar-H), 4.54 (dd, J = 6.54 Hz, 1H, -CH), 3.70(s, 3H, -CH<sub>3</sub>), 3.56(s, 3H, -CH<sub>3</sub>), 2.41-2.50(m, 2H, -CH<sub>2</sub>), 2.05-2.12(m, 2H, -CH<sub>2</sub>); <sup>13</sup>CNMR (75 MHz, CDCl<sub>3</sub>) δ 173.61, 168.89, 167.38, 155.92, 132.83, 131.54, 130.40, 128.14, 126.78, 121.21, 113.53, 54.95, 53.14, 51.44, 29.91, 27.29; HRMS (ESI): calcd. for C<sub>20</sub>H<sub>22</sub>N<sub>2</sub>O<sub>5</sub> [M + H]<sup>+</sup> 371.1601, found 371.1603. HPLC (80% methanol in water): t<sub>R</sub> = 4.29 min, 98.45%.

**4-Benzamido-5-(diethylamino)-5-oxopentanoic acid (DDO-5710).** Yield: 83.66%. M.p.:165-167 °C. <sup>1</sup>HNMR(300 MHz, DMSO) δ 12.17(s, 1H, -OH), 8.52 (d, J = 8.13 Hz, 1H, -NH), 7.88(d, J = 7.08 Hz, 2H, -Ar-H), 7.43-7.53(m, 3H, -Ar-H), 4.85(dd, J = 7.38 Hz, 1H, -CH), 3.44-3.54(m, 1H, -CH<sub>2</sub>), 3.34-3.42(m, 2H, -CH<sub>2</sub>), 3.08-3.15(m, 1H, -CH<sub>2</sub>), 2.33(t, J = 6.90 Hz, 2H, -CH<sub>2</sub>), 1.85-1.92(m, 2H, -CH<sub>2</sub>), 1.18(t, J = 6.84 Hz, 3H, -CH<sub>3</sub>), 1.01(t, J = 6.96 Hz, 3H, -CH<sub>3</sub>); <sup>13</sup>CNMR (75 MHz, CDCl<sub>3</sub>) δ 175.49, 170.43, 167.14, 132.94, 131.38, 128.04, 126.82, 48.21, 41.49, 40.17, 29.30, 28.28, 13.95, 12.34; HRMS (ESI): calcd. for C<sub>16</sub>H<sub>22</sub>N<sub>2</sub>O<sub>4</sub> [M + H]<sup>+</sup> 307.1652, found 307.1657. HPLC (80% methanol in water): t<sub>R</sub> = 2.85 min, 99.10%.

**4-Benzamido-5-(ethylamino)-5-oxopentanoic acid (DDO-5711).** Yield: 83.84%. M.p.: 170-172 °C. <sup>1</sup>HNMR(300 MHz, DMSO) δ 12.17(s, 1H, -OH), 8.45 (d, J = 7.77 Hz, 1H, -NH), 7.97-8.01(m, 1H, -Ar-H), 7.91(d, J = 7.11 Hz, 2H, -Ar-H), 7.46-7.56(m, 2H, -Ar-H), 4.39-4.40(m, 1H, -CH), 3.03-3.12(m, 2H, -CH<sub>2</sub>), 2.23-2.33(m, 2H, -CH<sub>2</sub>), 1.91-2.04(m, 2H, -CH<sub>2</sub>), 1.02(t, J = 7.20 Hz, 3H, -CH<sub>3</sub>); HRMS (ESI): calcd. for C<sub>14</sub>H<sub>18</sub>N<sub>2</sub>O<sub>4</sub> [M + H]<sup>+</sup> 279.1339, found 279.1342. HPLC (80% methanol in water): t<sub>R</sub> = 2.79 min, 98.47%.

**4-Benzamido-5-(dimethylamino)-5-oxopentanoic acid (DDO-5712).** Yield: 56.02%. M.p.: 156-158 °C. <sup>1</sup>HNMR(300 MHz, DMSO) δ 8.54 (d, J = 7.08 Hz, 1H, -NH), 7.88(d, J = 7.20 Hz, 2H, -Ar-H), 7.43-7.53(m, 3H, -Ar-H), 4.90(d, J = 7.38 Hz, 1H, -CH), 3.09(s, 3H, -CH<sub>3</sub>), 2.84(s, 3H, -CH<sub>3</sub>), 1.88-1.90(m, 2H, -CH<sub>2</sub>), 1.82(s, 2H, -CH<sub>2</sub>); HRMS (ESI): calcd. for C<sub>14</sub>H<sub>18</sub>N<sub>2</sub>O<sub>4</sub> [M + H]<sup>+</sup> 279.1339, found 279.1343. HPLC (80% methanol in water): t<sub>R</sub> = 2.79 min, 98.56%.

**4-Benzamido-5-oxo-5-(piperidin-1-yl)pentanoic acid (DDO-5713).** Yield: 76.56%. M.p.: 202-204 °C. <sup>1</sup>HNMR(300 MHz, DMSO) δ 12.18(s, 1H, -OH), 8.58(d, J = 8.10 Hz, 1H, -NH), 7.90 (d, J = 6.96 Hz, 2H, -Ar-H), 7.45-7.58(m, 3H, -Ar-H), 4.93-4.97 (m, 1H, -CH), 3.37-3.59(m, 4H, -CH<sub>2</sub>), 2.31-2.52(m, 2H, -CH<sub>2</sub>), 1.83-1.96(m, 2H, -CH<sub>2</sub>), 1.48-1.60(m, 6H, -CH<sub>2</sub>); HRMS (ESI): calcd. for C<sub>17</sub>H<sub>22</sub>N<sub>2</sub>O<sub>4</sub> [M + H]<sup>+</sup> 319.1652, found 319.1649. HPLC (80% methanol in water): t<sub>R</sub> = 2.90 min, 98.82%.

**4-Benzamido-5-((4-bromophenyl)amino)-5-oxopentanoic acid (DDO-5714).** Yield: 75.87%. M.p.: 194-196 °C. <sup>1</sup>HNMR(300 MHz, DMSO) δ 10.39(s, 1H, -NH), 8.71(d, J = 6.63 Hz, 1H, -NH), 7.92 (d, J = 6.66 Hz, 2H, -Ar-H), 7.46-7.83(m, 7H, -Ar-H), 4.55 (d, J = 5.25 Hz, 1H, -CH), 2.36-2.64(m, 2H, -CH<sub>2</sub>), 2.06-2.20(m, 2H, -CH<sub>2</sub>); HRMS (ESI): calcd. for C<sub>18</sub>H<sub>17</sub>BrN<sub>2</sub>O<sub>4</sub> [M + H]<sup>+</sup> 405.0444, found 405.0438. HPLC (80% methanol in water): t<sub>R</sub> = 3.14 min, 98.92%.

**4-Benzamido-5-((4-chlorophenyl)amino)-5-oxopentanoic acid (DDO-5715).** Yield: 76.18%. M.p.: 195-197 °C. <sup>1</sup>HNMR(300 MHz, DMSO) δ 12.24(s, 1H, -OH), 10.29(s, 1H, -NH), 8.68(d, J = 7.29 Hz, 1H, -NH), 7.93 (d, J = 7.02 Hz, 2H, -Ar-H), 7.67(d, J = 8.88 Hz, 2H, -Ar-H), 7.47-7.57(m, 3H, -Ar-H), 7.38(d, J = 8.79 Hz, 2H, -Ar-H), 4.56 (dd, J = 6.45 Hz, 1H, -CH), 2.35-2.52(m, 2H, -CH<sub>2</sub>), 2.05-2.10(m, 2H, -CH<sub>2</sub>); HRMS (ESI): calcd. for

$C_{18}H_{17}ClN_2O_4$  [M + H]<sup>+</sup> 361.095, found 361.095. HPLC (80% methanol in water):  $t_R$  = 3.04 min, 99.92%.

**4-Benzamido-5-((4-methoxyphenyl)amino)-5-oxopentanoic acid (DDO-5716).** Yield: 76.22%. M.p.: 192-194 °C. <sup>1</sup>HNMR(300 MHz, DMSO)  $\delta$  9.97(s, 1H, -NH), 8.59(d, J = 7.62 Hz, 1H, -NH), 7.91 (d, J = 7.11 Hz, 2H, -Ar-H), 7.45-7.56(m, 5H, -Ar-H), 6.86(t, J = 8.85 Hz, 2H, -Ar-H) 4.54(dd, J = 7.29 Hz, 1H, -CH), 3.70(s, 3H, -OCH<sub>3</sub>), 2.26-2.49(m, 2H, -CH<sub>2</sub>), 2.02-2.21(m, 2H, -CH<sub>2</sub>); <sup>13</sup>CNMR (75 MHz, DMSO)  $\delta$  179.22, 169.85, 166.94, 151.95, 142.17, 134.26, 131.55, 128.16, 127.53, 120.85, 113.77, 55.11, 53.69, 26.44, 24.56; HRMS (ESI): calcd. for  $C_{19}H_{20}N_2O_5$  [M + H]<sup>+</sup> 357.1445, found 357.145. HPLC (80% methanol in water):  $t_R$  = 2.74 min, 98.97%.

**2-Benzamidopentanedioic acid (DDO-5717).** Yield: 81.83% ; M.p.: 140-142 °C. <sup>1</sup>HNMR(300 MHz, D<sub>2</sub>O)  $\delta$  7.63-7.66(m, 2H, -Ar-H), 7.48(t, J = 6.12 Hz, 1H, -Ar-H), 7.39(t, J = 7.74 Hz, 2H, -Ar-H), 4.49(dd, J = 5.13 Hz, 1H, -CH), 2.44(t, J = 7.23 Hz, 2H, -CH<sub>2</sub>), 2.17-2.19(m, 1H, -CH<sub>2</sub>), 2.03-2.06(m, 1H, -CH<sub>2</sub>); HRMS (ESI): calcd. for  $C_{12}H_{13}NO_5$  [M + H]<sup>+</sup> 252.0866, found 252.0867. HPLC (80% methanol in water):  $t_R$  = 2.70 min, 99.27%.

**2-Benzamido-N1,N1,N5,N5-tetraethylpentanediamide (DDO-5718).** Yield: 59.8%; M.p.: 97-98 °C. <sup>1</sup>HNMR(300 MHz, DMSO)  $\delta$  8.55 (d, J = 7.59 Hz, 1H, -NH), 7.88(d, J = 7.26 Hz, 2H, -Ar-H), 7.42-7.52(m, 3H, -Ar-H), 4.81(d, J = 7.38 Hz, 1H, -CH), 3.59-3.66(m, 1H, -CH<sub>2</sub>), 3.41-3.47(m, 2H, -CH<sub>2</sub>), 3.20-3.36(m, 4H, -CH<sub>2</sub>), 3.04-3.14(m, 1H, -CH<sub>2</sub>), 2.31-2.49(m, 2H, -CH<sub>2</sub>), 1.95(d, J = 19.32 Hz, 2H, -CH<sub>2</sub>), 1.02-1.07(m, 12H, -CH<sub>3</sub>); HRMS (ESI): calcd. for  $C_{20}H_{31}N_3O_3$  [M + H]<sup>+</sup> 362.2438, found 362.2436. HPLC (80% methanol in water):  $t_R$  = 4.32 min, 98.83%.

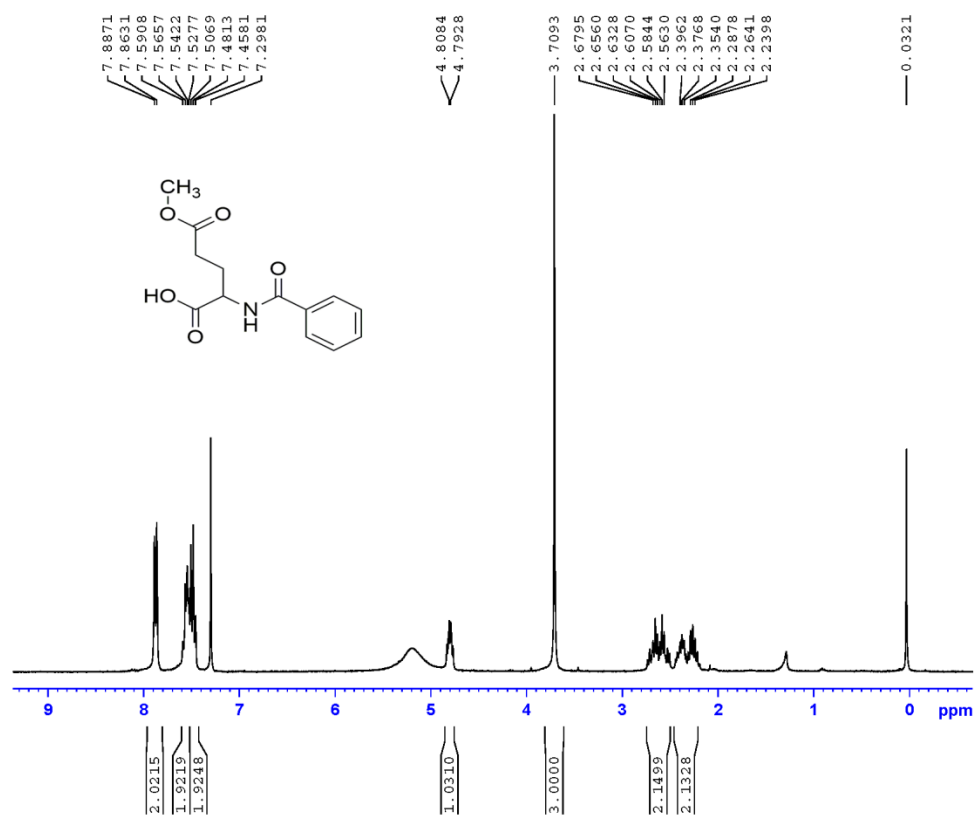

Supplementary Fig. 1  $^1\text{H}$  NMR (300 MHz,  $\text{CDCl}_3$ ) of DDO-5702

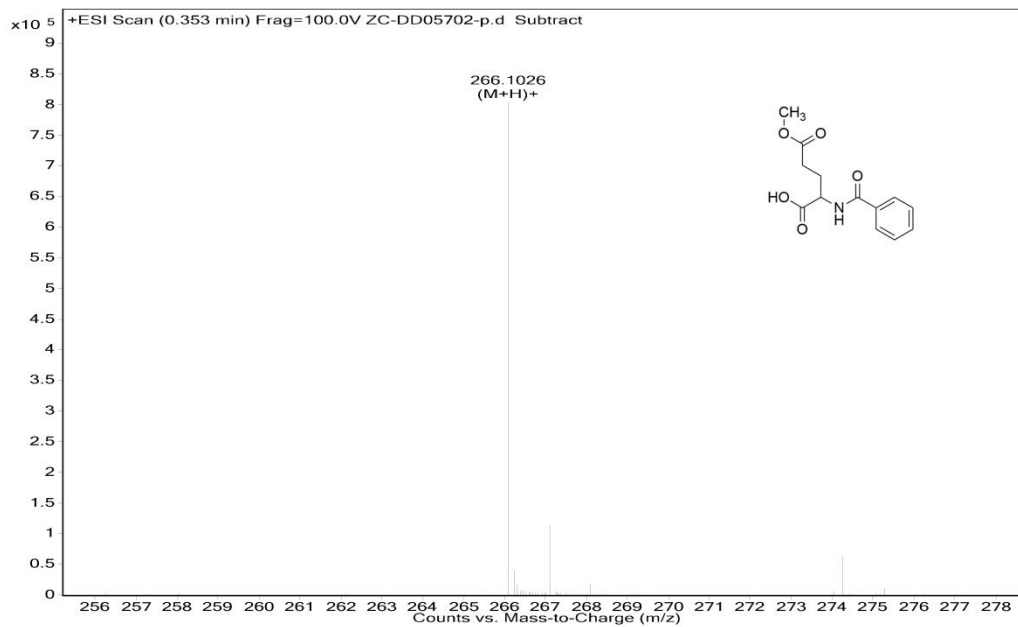

Supplementary Fig. 2 HR-MS (ESI) of DDO-5702

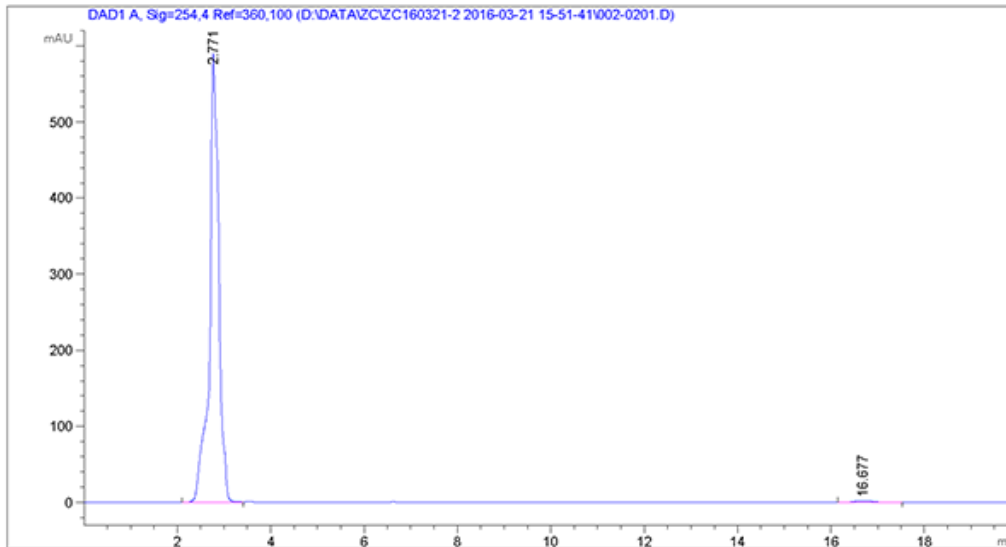

| Peak # | Retention time [min] | Type | Peak width [min] | Peak area [mAU*s] | Peak height [mAU] | Peak area % |
|--------|----------------------|------|------------------|-------------------|-------------------|-------------|
| 1      | 2.771                | BB   | 0.3073           | 9382.75195        | 590.68726         | 98.8311     |
| 2      | 16.677               | BB   | 0.3753           | 110.97214         | 1.69280           | 1.1689      |

Supplementary Fig. 3 HPLC of DDO-5702

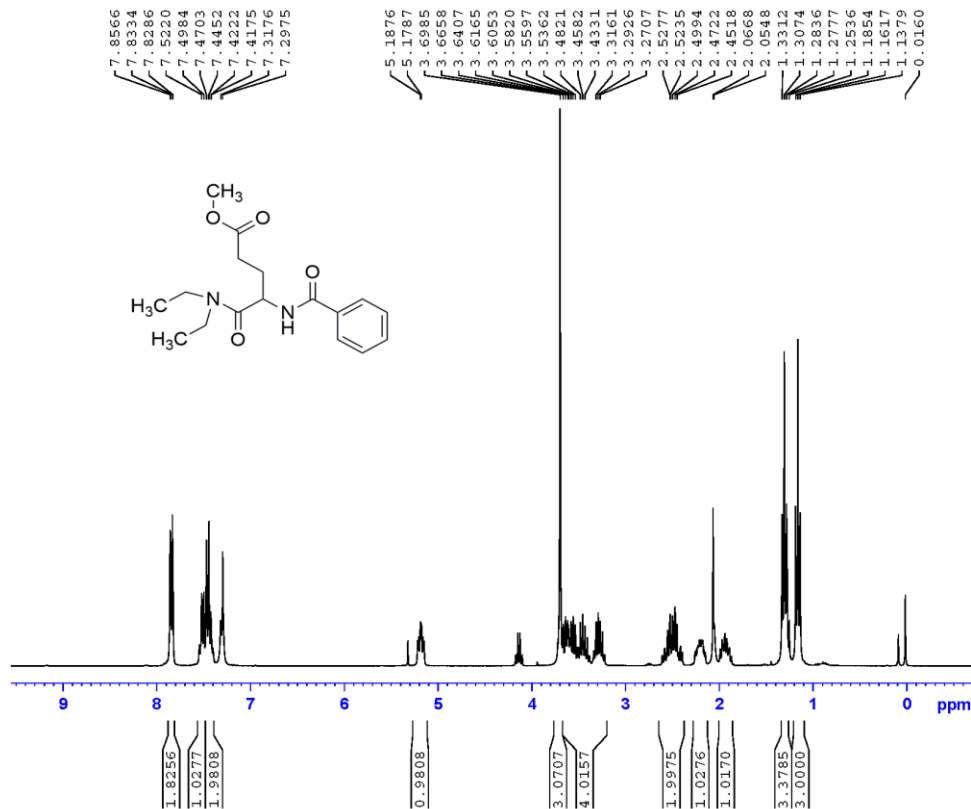

Supplementary Fig. 4 <sup>1</sup>H NMR (300 MHz, CDCl<sub>3</sub>) of DDO-5703

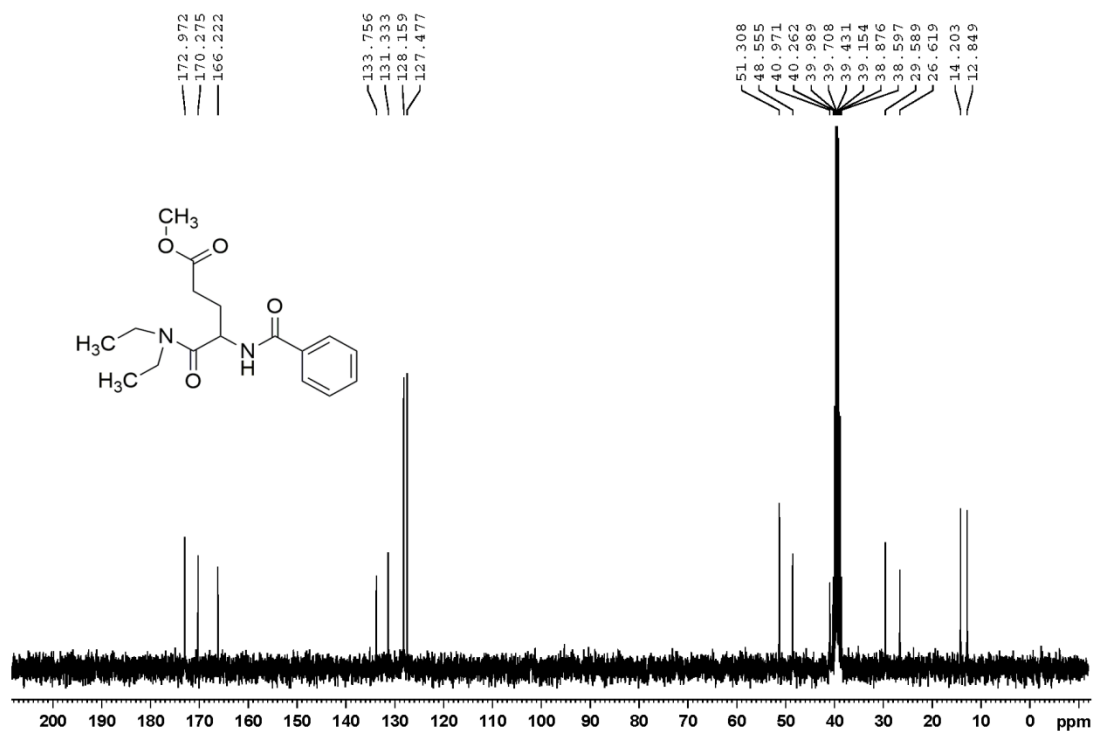

Supplementary Fig. 5 <sup>13</sup>C NMR (75 MHz, CDCl<sub>3</sub>) of DDO-5703

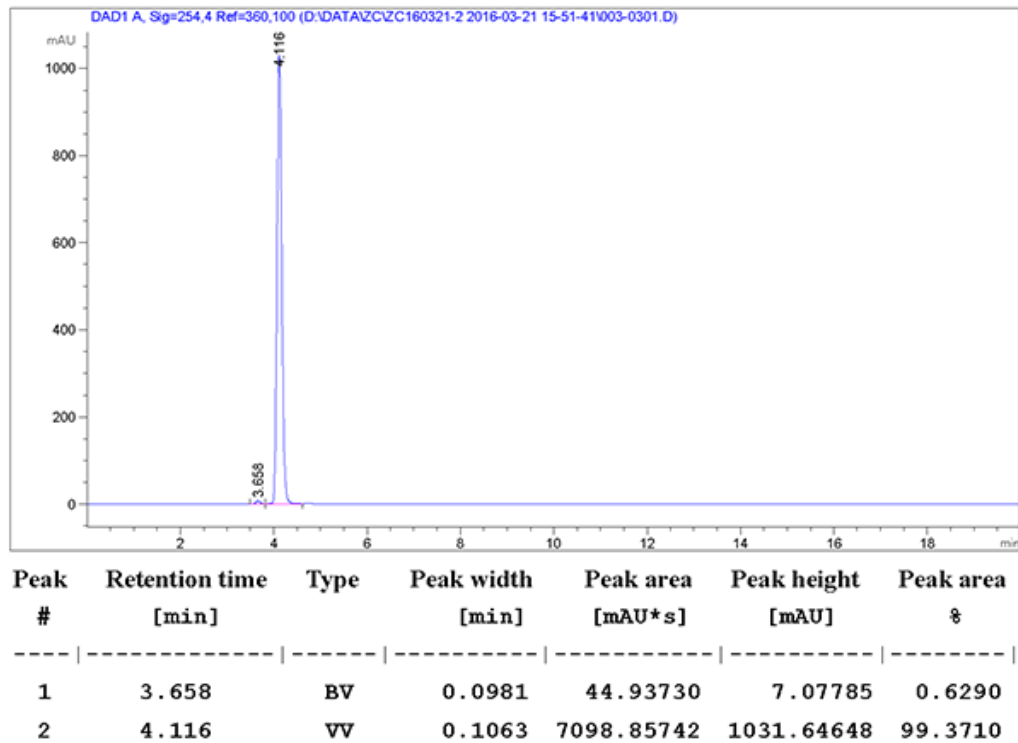

Supplementary Fig. 6 HPLC of DDO-5703



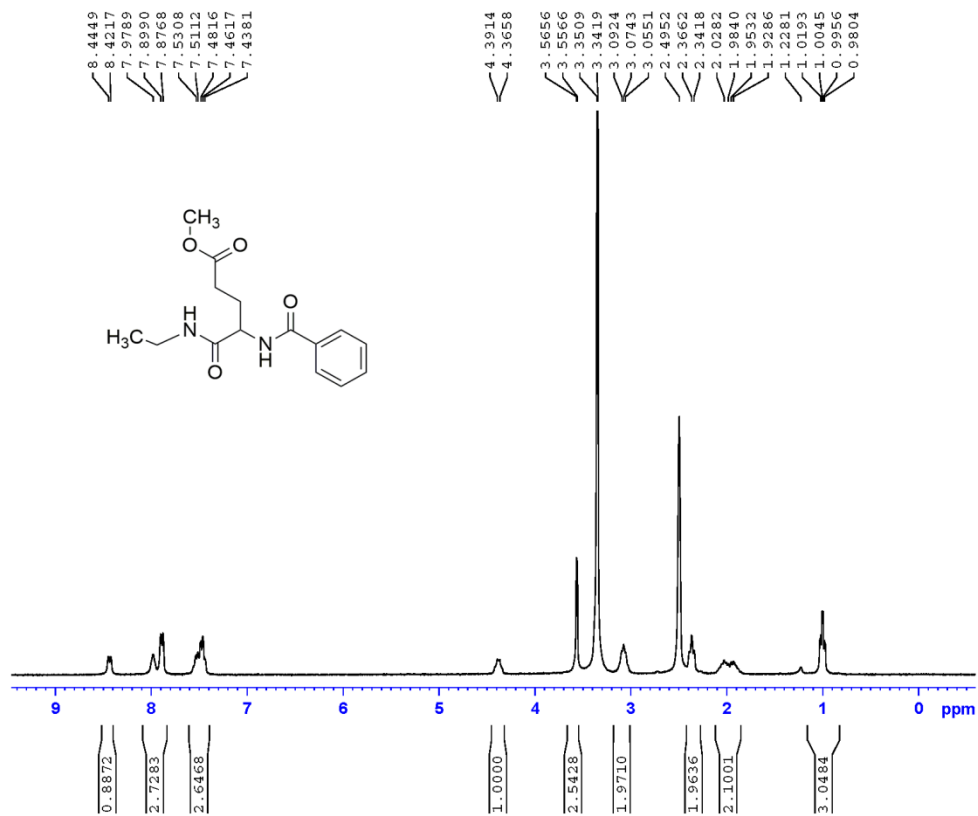

**Supplementary Fig. 7**  $^1\text{H}$  NMR (300 MHz, DMSO) of DDO-5704

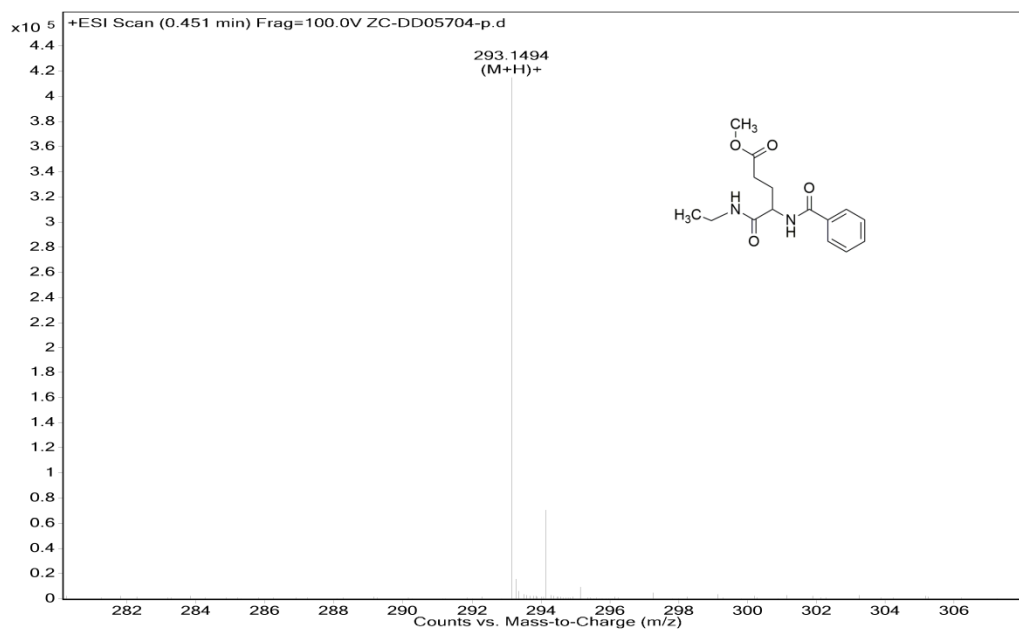

**Supplementary Fig. 8** HR-MS (ESI) of DDO-5704

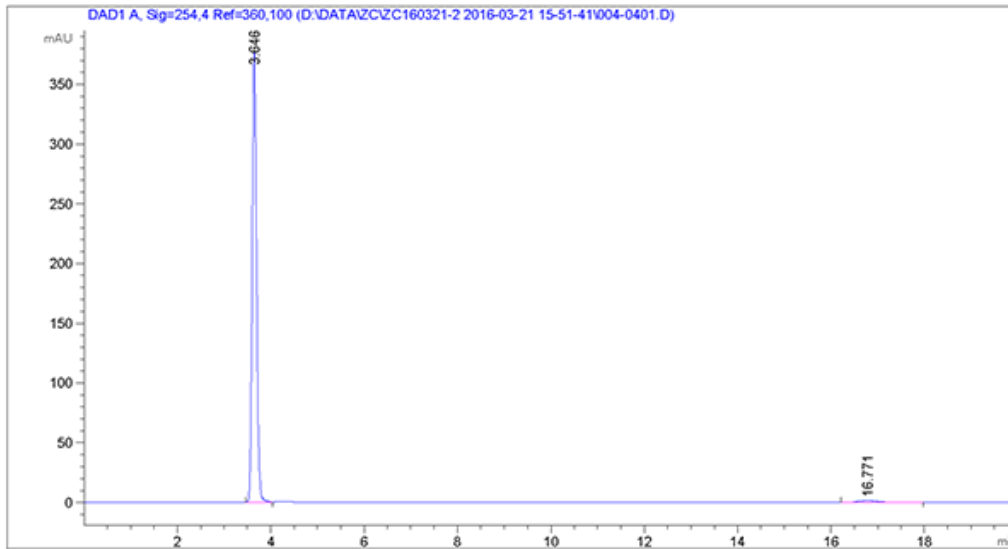

| Peak # | Retention time [min] | Type | Peak width [min] | Peak area [mAU*s] | Peak height [mAU] | Peak area % |
|--------|----------------------|------|------------------|-------------------|-------------------|-------------|
| 1      | 3.646                | BB   | 0.0980           | 2393.93237        | 377.32944         | 98.3816     |
| 2      | 16.771               | BB   | 0.3835           | 39.38092          | 1.54418           | 1.6184      |

Supplementary Fig. 9 HPLC of DDO-5704

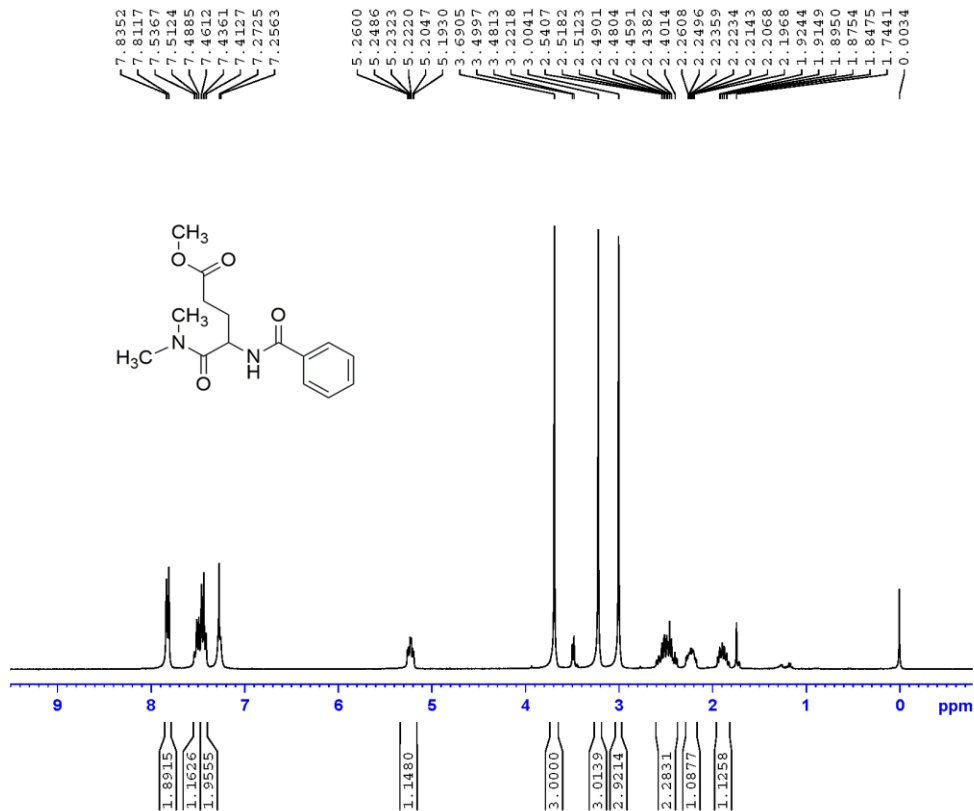

Supplementary Fig. 10 <sup>1</sup>H NMR (300 MHz, CDCl<sub>3</sub>) of DDO-5705

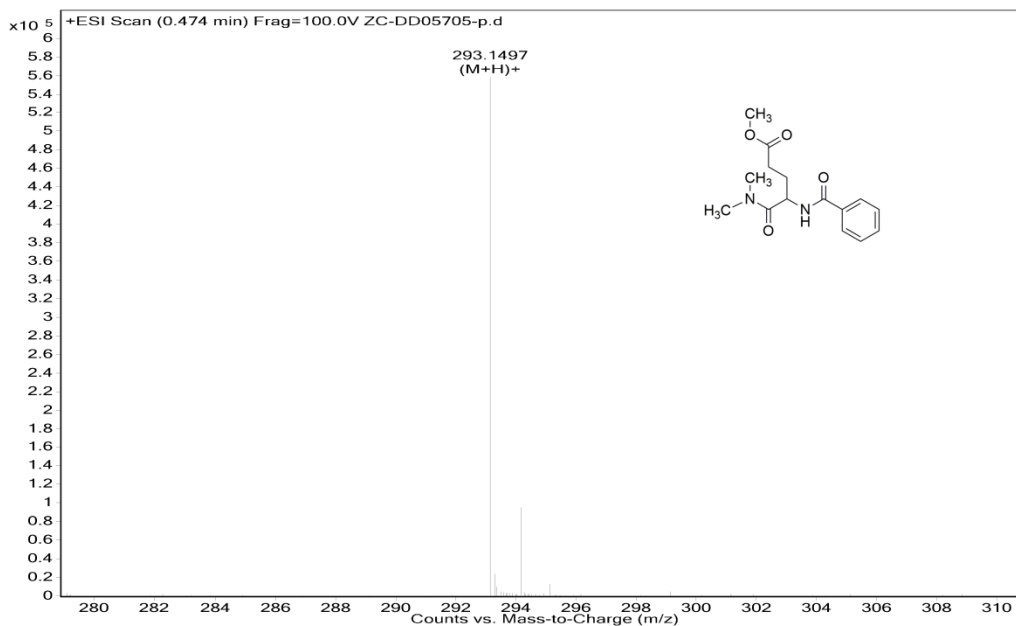

Supplementary Fig. 11 HR-MS (ESI) of DDO-5705

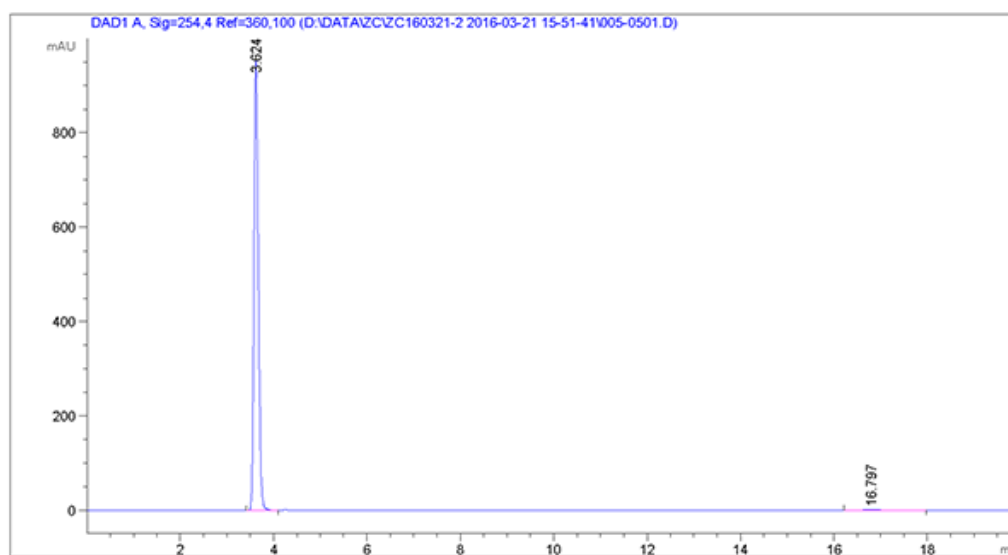

| Peak # | Retention time [min] | Type | Peak width [min] | Peak area [mAU*s] | Peak height [mAU] | Peak area % |
|--------|----------------------|------|------------------|-------------------|-------------------|-------------|
| 1      | 3.624                | BB   | 0.0981           | 6044.99316        | 952.38562         | 99.2800     |
| 2      | 16.797               | BB   | 0.3788           | 43.83801          | 1.72317           | 0.7200      |

Supplementary Fig. 12 HPLC of DDO-5705

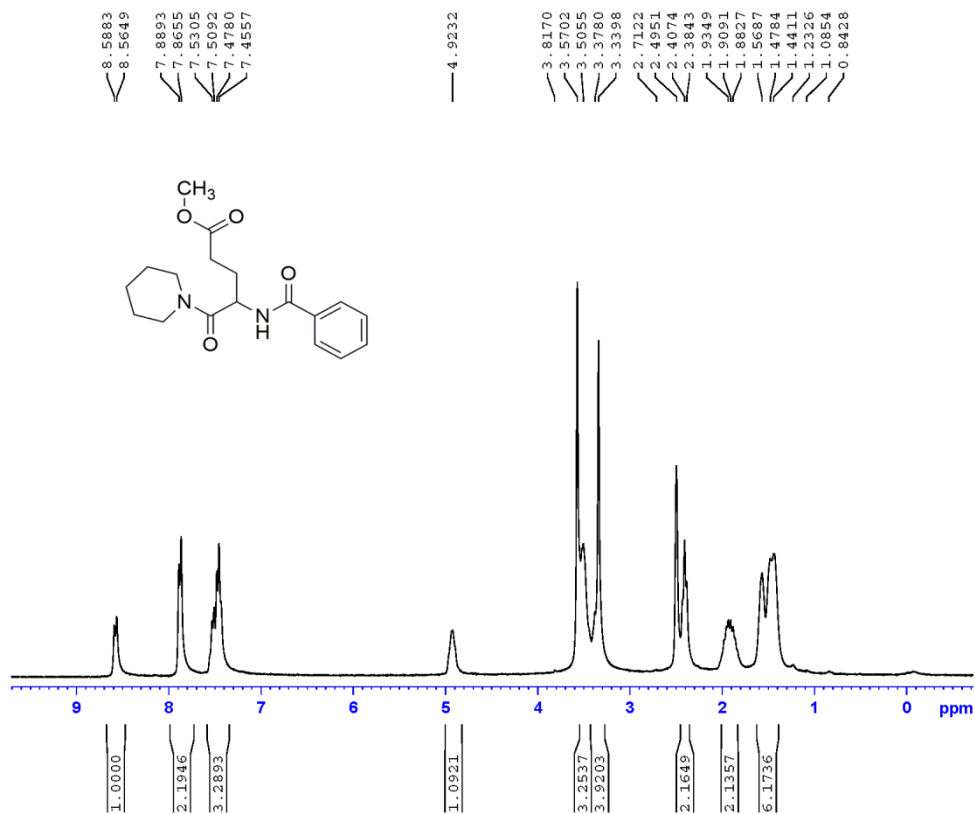

Supplementary Fig. 13 <sup>1</sup>H NMR (300 MHz, DMSO) of DDO-5706

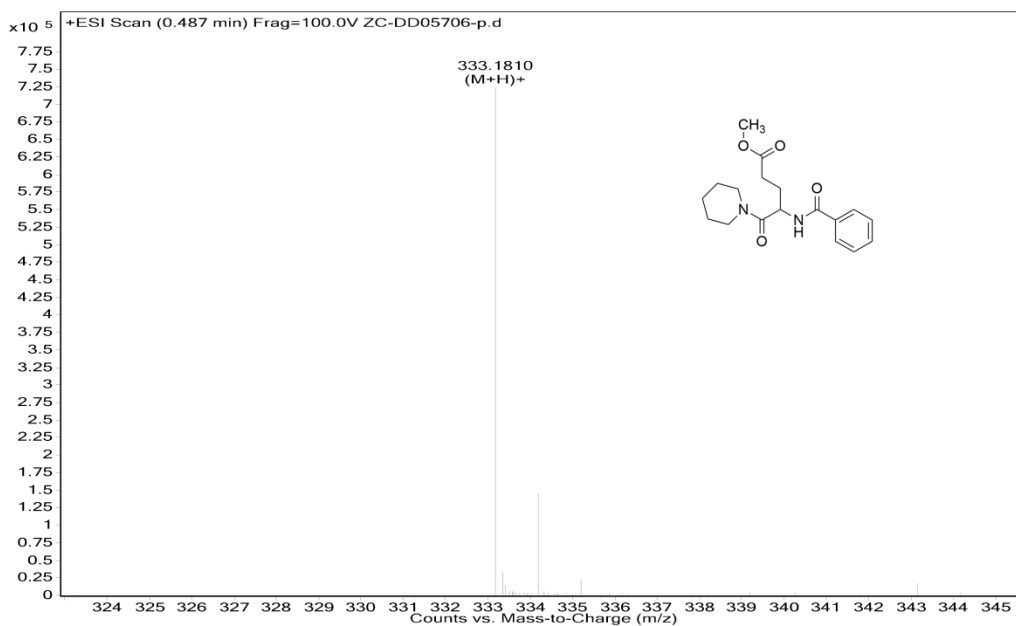

Supplementary Fig. 14 HR-MS (ESI) of DDO-5706

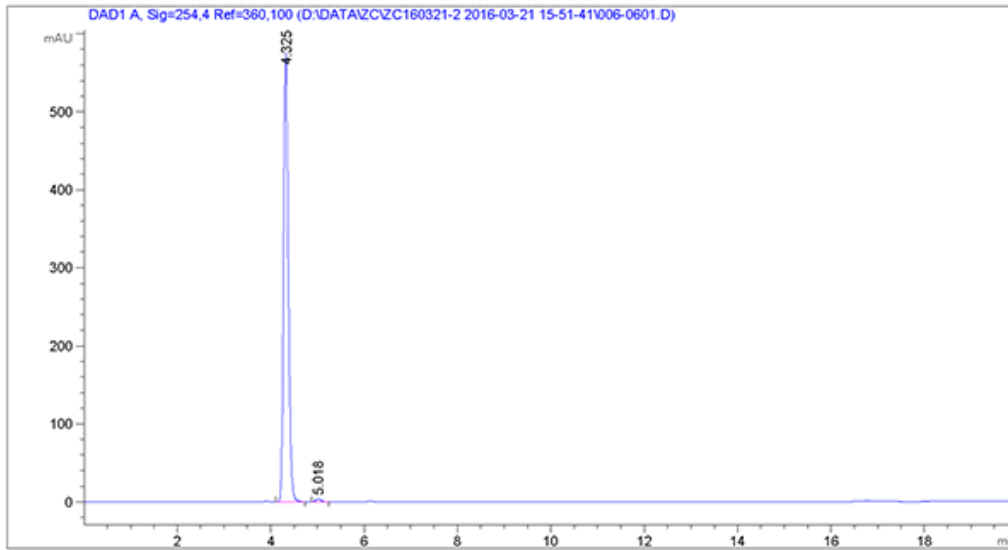

| Peak # | Retention time [min] | Type | Peak width [min] | Peak area [mAU*s] | Peak height [mAU] | Peak area % |
|--------|----------------------|------|------------------|-------------------|-------------------|-------------|
| 1      | 4.325                | BB   | 0.1079           | 4041.79712        | 575.76794         | 99.3912     |
| 2      | 5.018                | BB   | 0.1174           | 24.75686          | 3.30384           | 0.6088      |

Supplementary Fig. 15 HPLC of DDO-5706

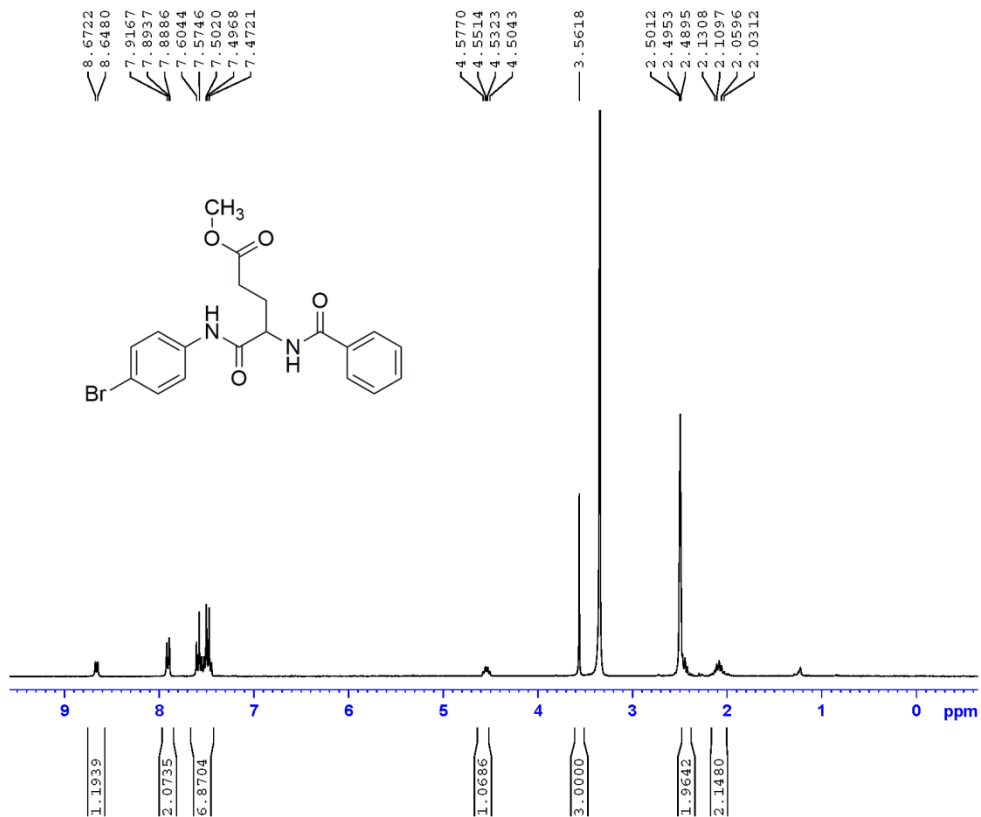

Supplementary Fig. 16 <sup>1</sup>H NMR (300 MHz, DMSO) of DDO-5707

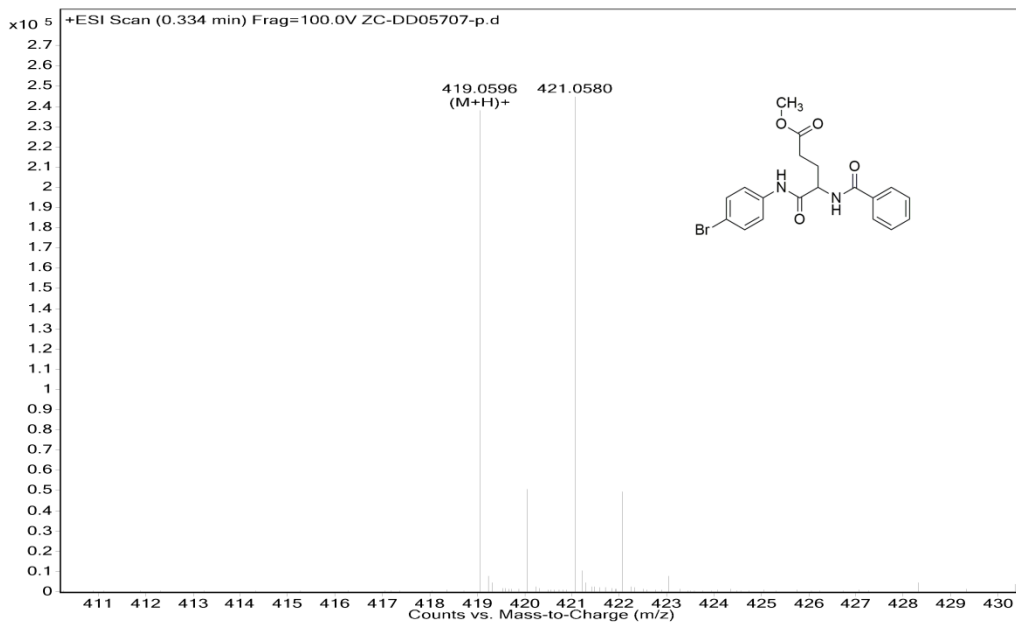

Supplementary Fig. 17 HR-MS (ESI) of DDO-5707

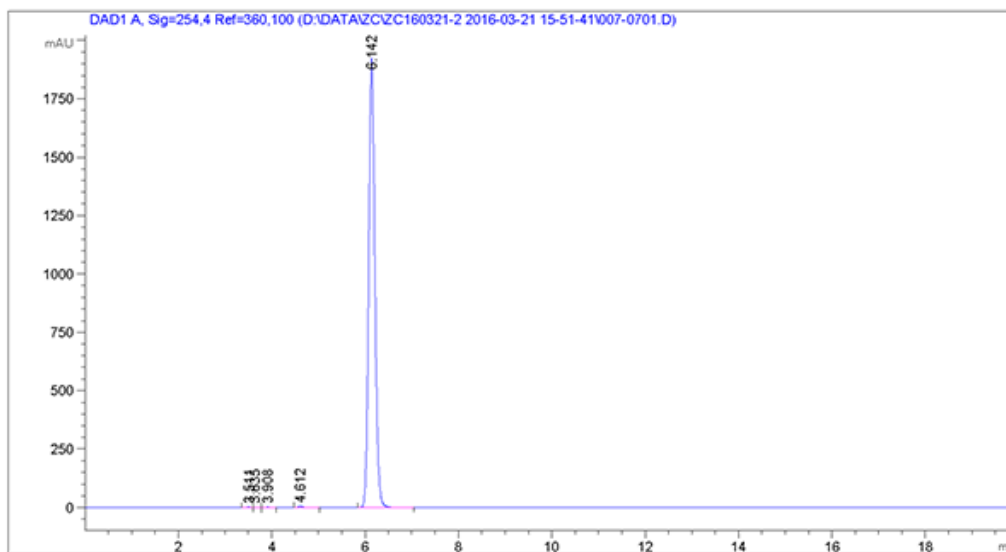

| Peak # | Retention time [min] | Type | Peak width [min] | Peak area [mAU*s] | Peak height [mAU] | Peak area % |
|--------|----------------------|------|------------------|-------------------|-------------------|-------------|
| 1      | 3.511                | BV   | 0.0922           | 15.84367          | 2.55890           | 0.0892      |
| 2      | 3.635                | VV   | 0.0944           | 6.79298           | 1.09537           | 0.0383      |
| 3      | 3.908                | VB   | 0.1102           | 14.49370          | 2.05796           | 0.0816      |
| 4      | 4.612                | BB   | 0.1103           | 34.22631          | 4.73637           | 0.1927      |
| 5      | 6.142                | BB   | 0.1402           | 1.76874e4         | 1925.60974        | 99.5982     |

Supplementary Fig. 18 HPLC of DDO-5707

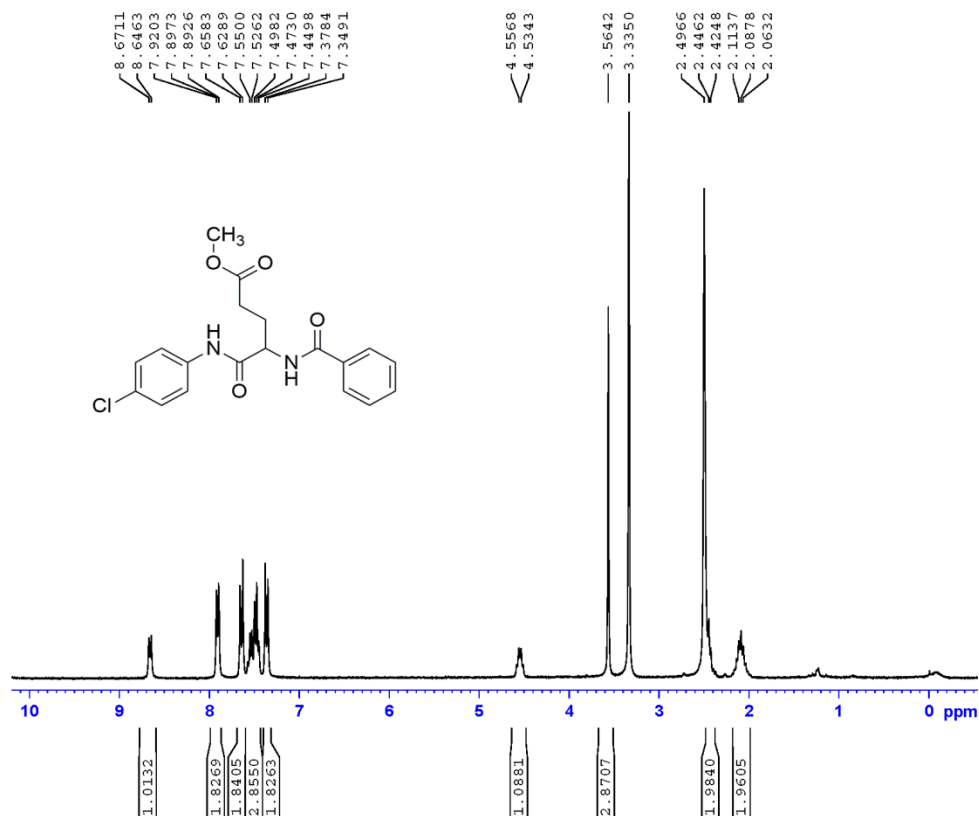

Supplementary Fig. 19  $^1\text{H}$  NMR (300 MHz, DMSO) of DDO-5708

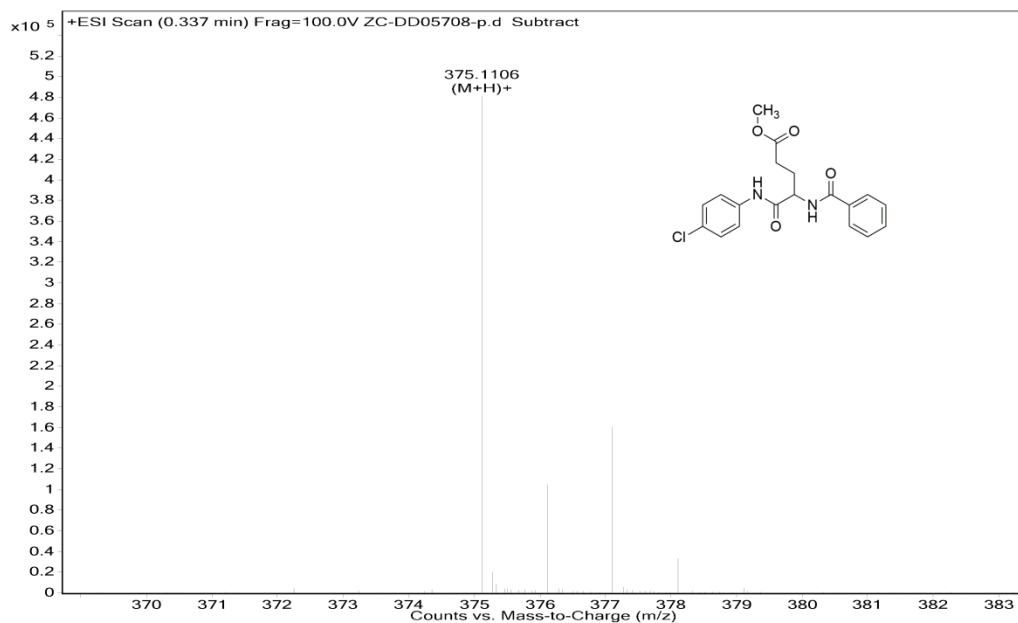

Supplementary Fig. 20 HR-MS (ESI) of DDO-5708

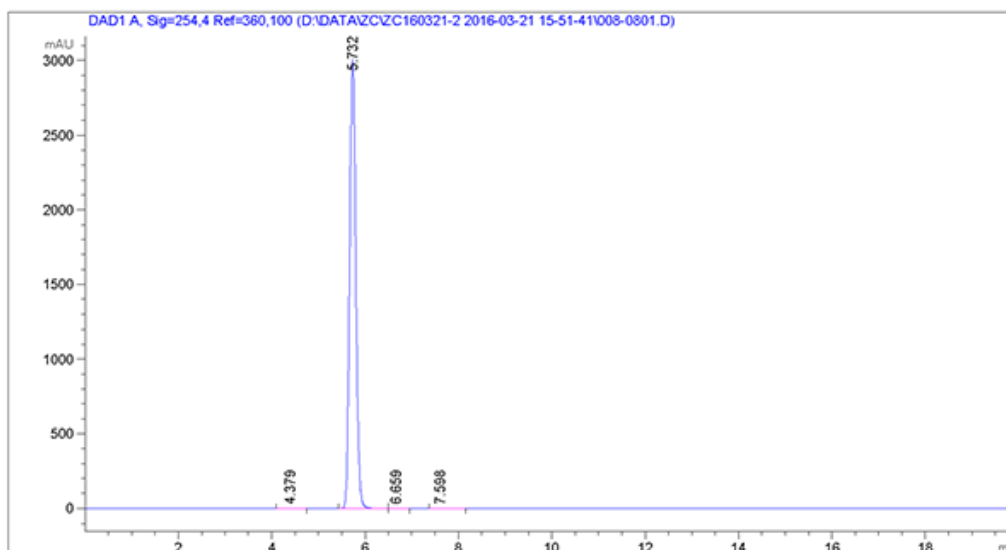

| Peak # | Retention time [min] | Type | Peak width [min] | Peak area [mAU*s] | Peak height [mAU] | Peak area % |
|--------|----------------------|------|------------------|-------------------|-------------------|-------------|
| 1      | 4.379                | BB   | 0.1560           | 12.92496          | 1.14226           | 0.0467      |
| 2      | 5.732                | BV   | 0.1430           | 2.76290e4         | 3012.27124        | 99.8649     |
| 3      | 6.659                | VB   | 0.1655           | 10.04289          | 2.43976           | 0.0363      |
| 4      | 7.598                | BB   | 0.1672           | 14.41418          | 1.34362           | 0.0521      |

Supplementary Fig. 21 HPLC of DDO-5708

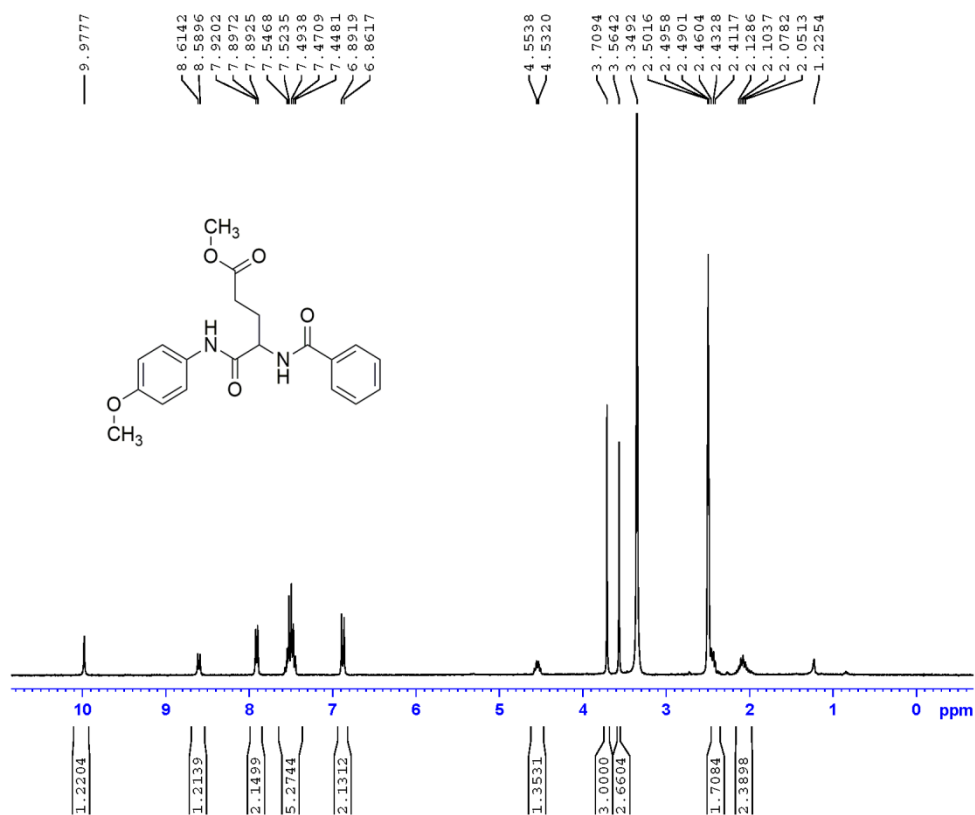

Supplementary Fig. 22 <sup>1</sup>H NMR (300 MHz, DMSO) of DDO-5709



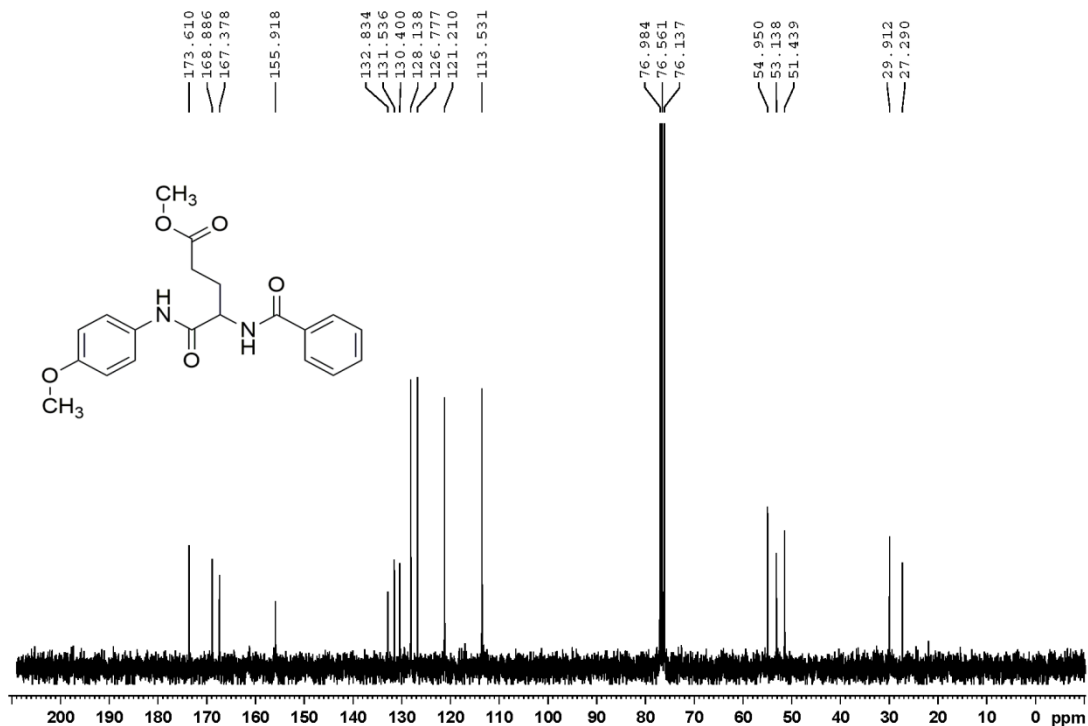

Supplementary Fig. 23 <sup>13</sup>C NMR (75 MHz, CDCl<sub>3</sub>) of DDO-5709

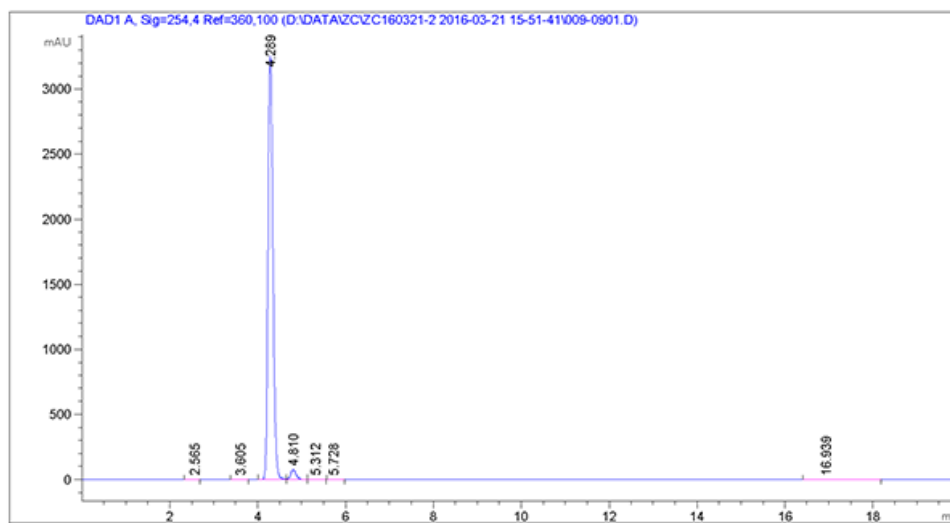

| Peak # | Retention time [min] | Type | Peak width [min] | Peak area [mAU*s] | Peak height [mAU] | Peak area % |
|--------|----------------------|------|------------------|-------------------|-------------------|-------------|
| 1      | 2.565                | BV   | 0.1068           | 13.48192          | 1.77086           | 0.0518      |
| 2      | 3.605                | BB   | 0.1660           | 26.24895          | 2.15709           | 0.1009      |
| 3      | 4.289                | BV   | 0.1226           | 2.56285e4         | 3254.78052        | 98.4499     |
| 4      | 4.810                | VB   | 0.1263           | 291.01223         | 75.58290          | 1.1179      |
| 5      | 5.312                | BB   | 0.1363           | 19.73229          | 2.25041           | 0.0758      |
| 6      | 5.728                | BB   | 0.1330           | 13.66351          | 1.61026           | 0.0525      |
| 7      | 16.939               | BB   | 0.3762           | 39.33923          | 1.53898           | 0.1512      |

Supplementary Fig. 24 HPLC of DDO-5709

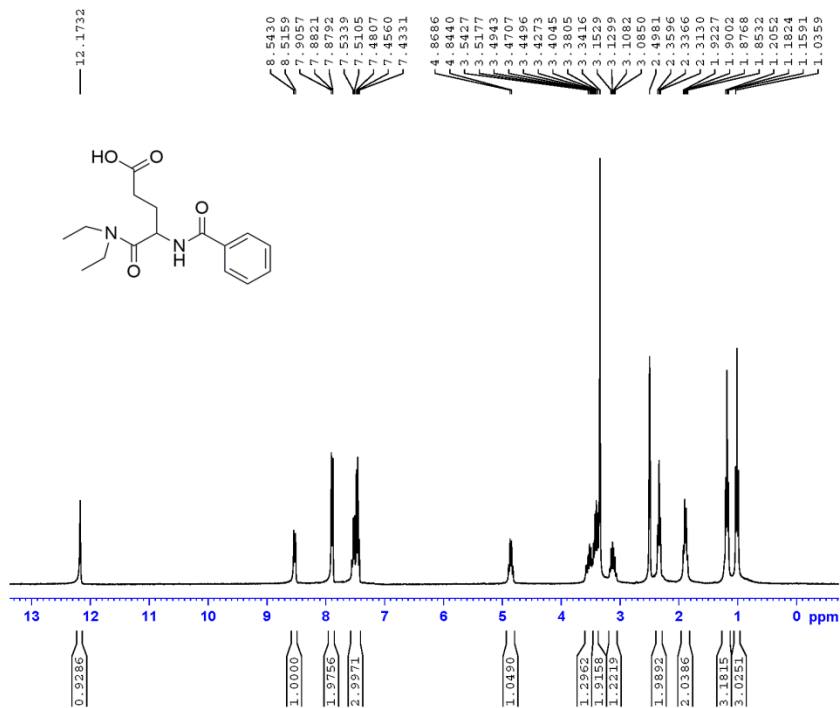

Supplementary Fig. 25  $^1\text{H NMR}$  (300 MHz, DMSO) of DDO-5710

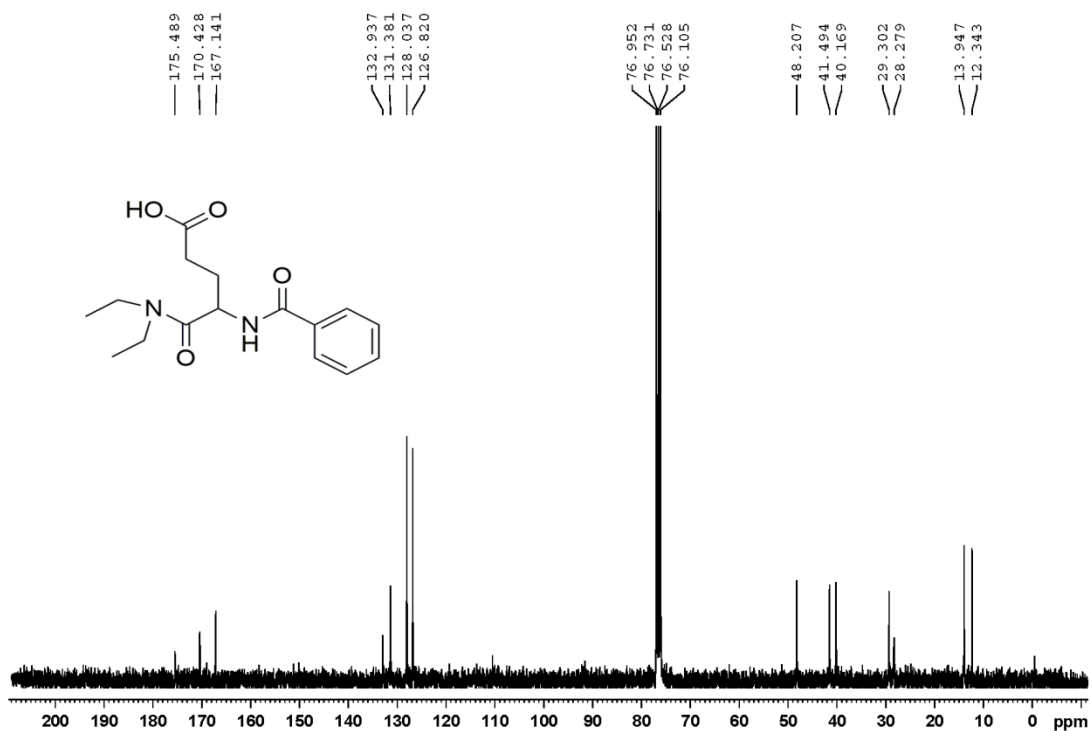

Supplementary Fig. 26  $^{13}\text{C NMR}$  (75 MHz,  $\text{CDCl}_3$ ) of DDO-5710

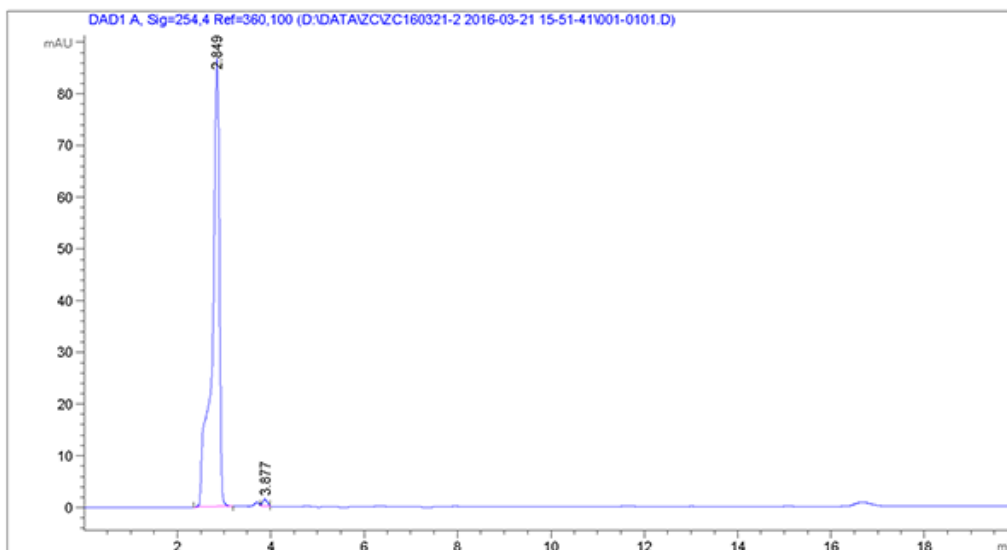

| Peak # | Retention time [min] | Type | Peak width [min] | Peak area [mAU*s] | Peak height [mAU] | Peak area % |
|--------|----------------------|------|------------------|-------------------|-------------------|-------------|
| 1      | 2.849                | BB   | 0.1575           | 952.66371         | 86.77528          | 99.09999    |
| 2      | 3.877                | VV   | 0.1113           | 8.65281           | 1.72317           | 0.9001      |

Supplementary Fig. 27 HPLC of DDO-5710

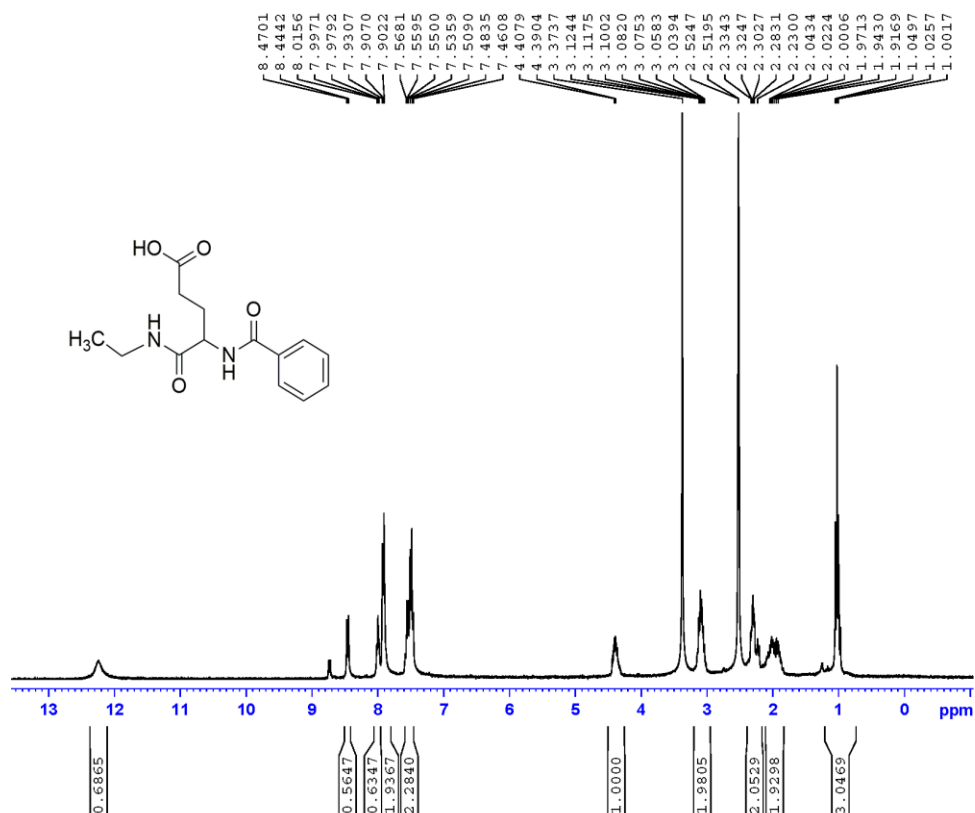

Supplementary Fig. 28 <sup>1</sup>H NMR (300 MHz, DMSO) of DDO-5711

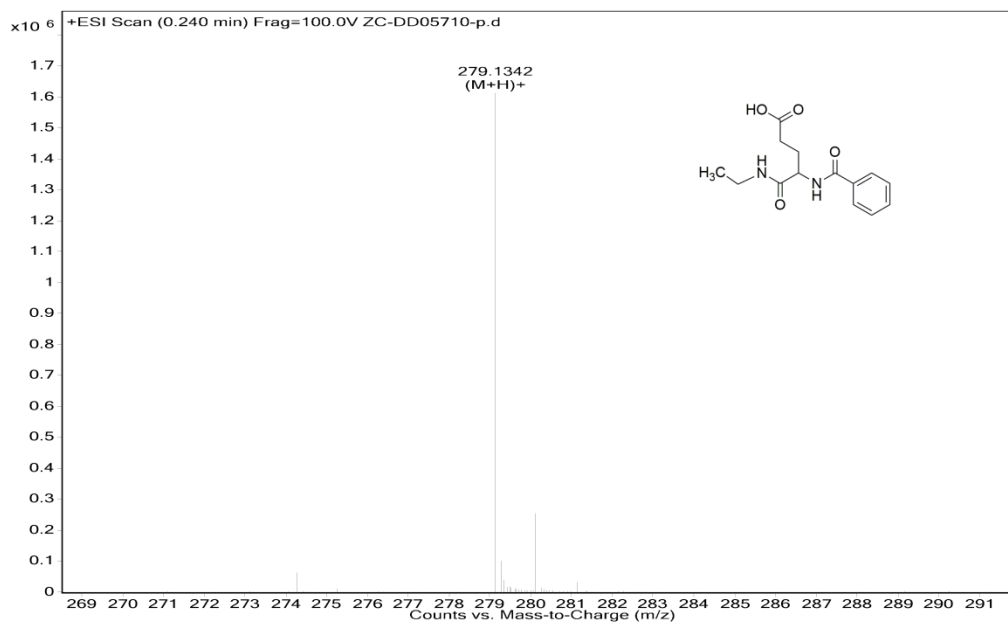

**Supplementary Fig. 29** HR-MS (ESI) of DDO-5711

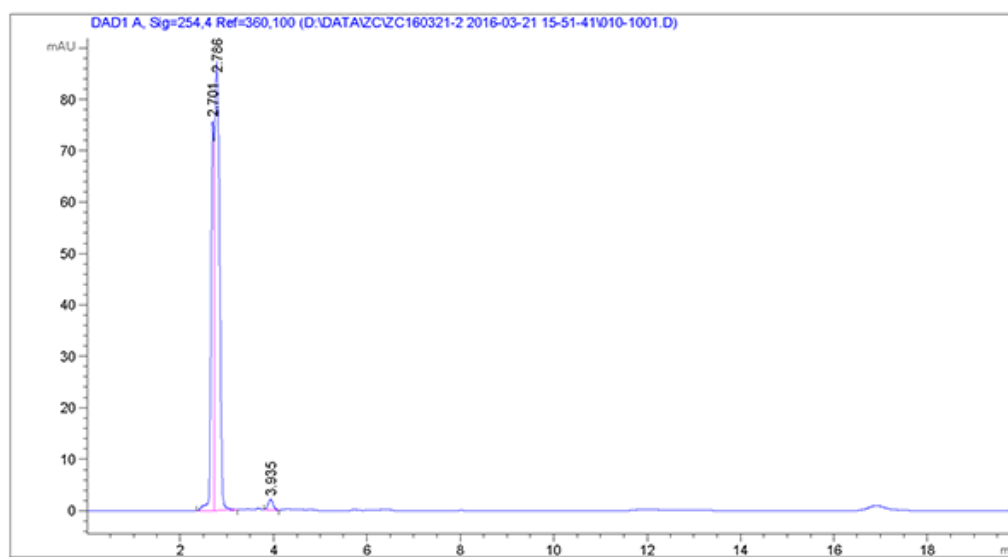

| Peak # | Retention time [min] | Type | Peak width [min] | Peak area [mAU*s] | Peak height [mAU] | Peak area % |
|--------|----------------------|------|------------------|-------------------|-------------------|-------------|
| 1      | 2.701                | BV   | 0.0641           | 325.46301         | 75.78884          | 33.4249     |
| 2      | 2.786                | VB   | 0.1125           | 633.34796         | 87.44965          | 65.0445     |
| 3      | 3.935                | BB   | 0.1161           | 14.90439          | 2.02062           | 1.5307      |

**Supplementary Fig. 30** HPLC of DDO-5711

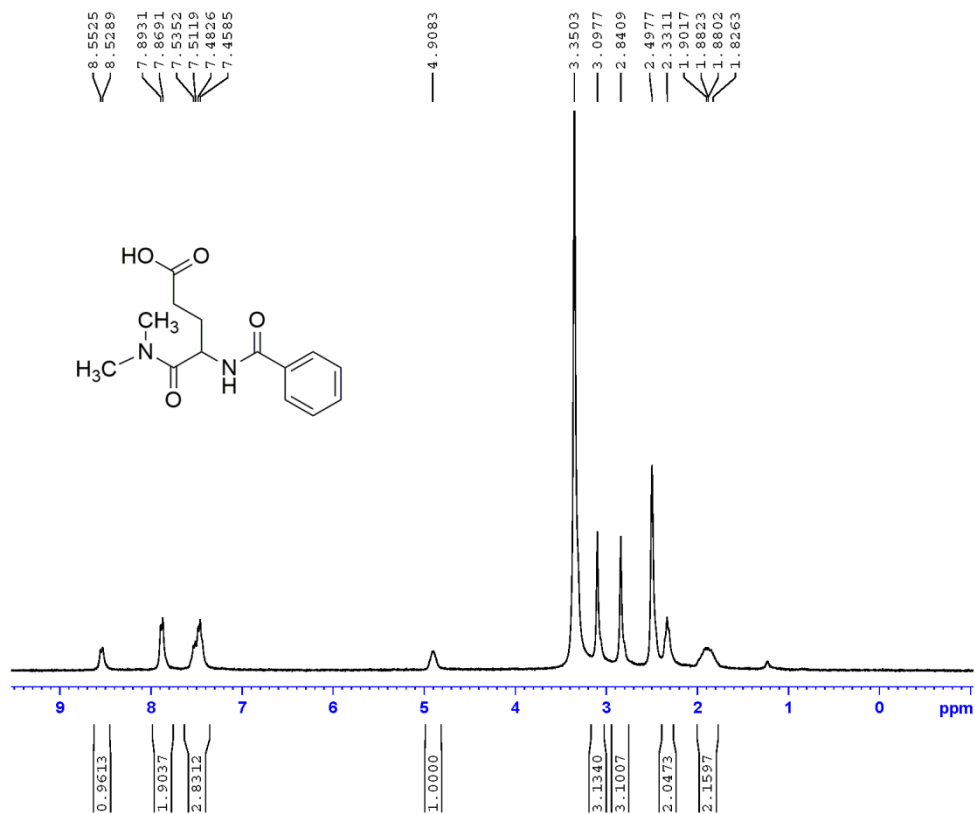

Supplementary Fig. 31 <sup>1</sup>H NMR (300 MHz, DMSO) of DDO-5712

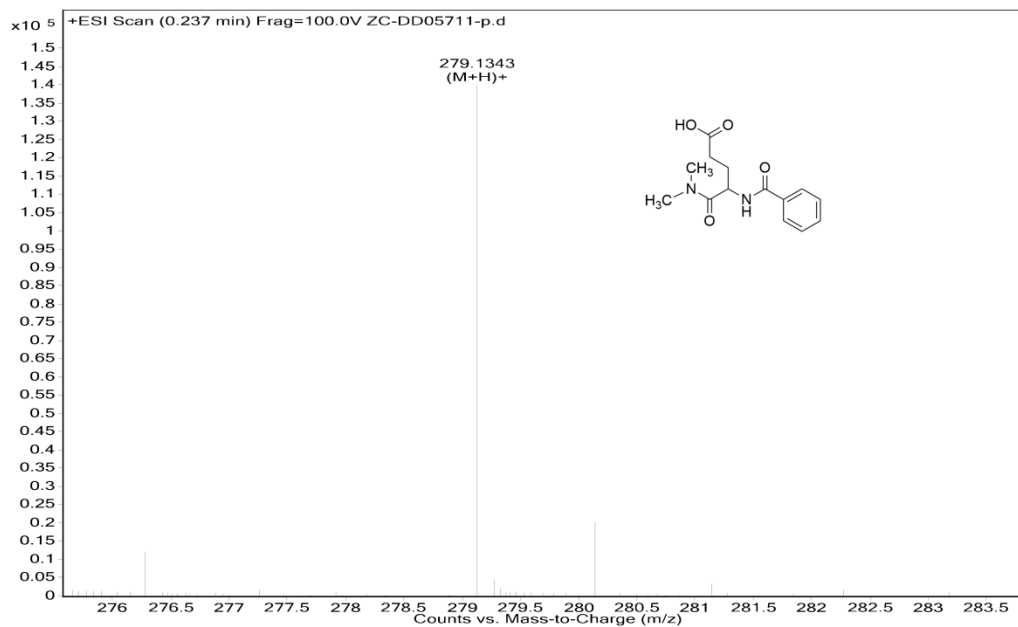

Supplementary Fig. 32 HR-MS (ESI) of DDO-5712

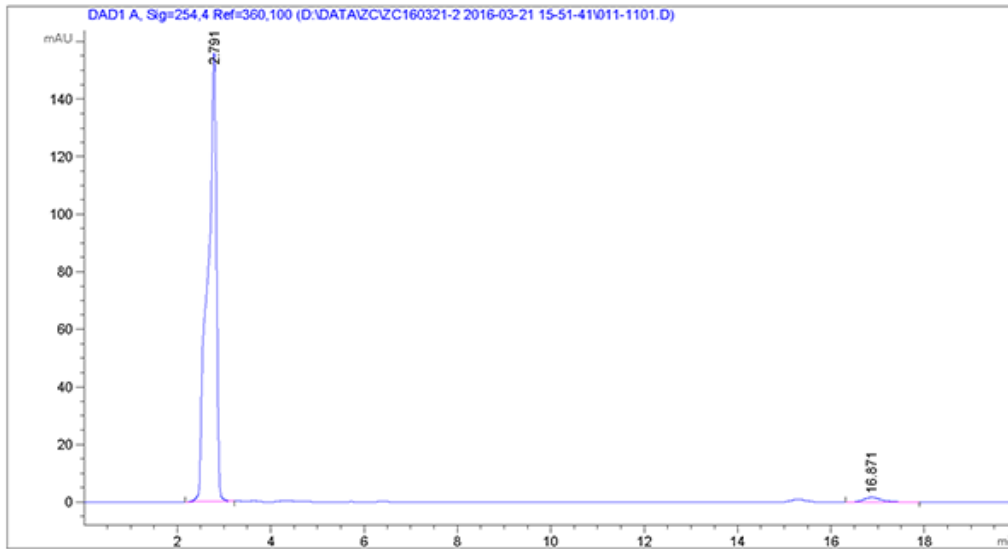

| Peak # | Retention time [min] | Type | Peak width [min] | Peak area [mAU*s] | Peak height [mAU] | Peak area % |
|--------|----------------------|------|------------------|-------------------|-------------------|-------------|
| 1      | 2.791                | BB   | 0.1754           | 8876.05371        | 155.88206         | 98.5609     |
| 2      | 16.871               | BB   | 0.3799           | 129.60037         | 1.57648           | 1.4391      |

Supplementary Fig. 33 HPLC of DDO-5712

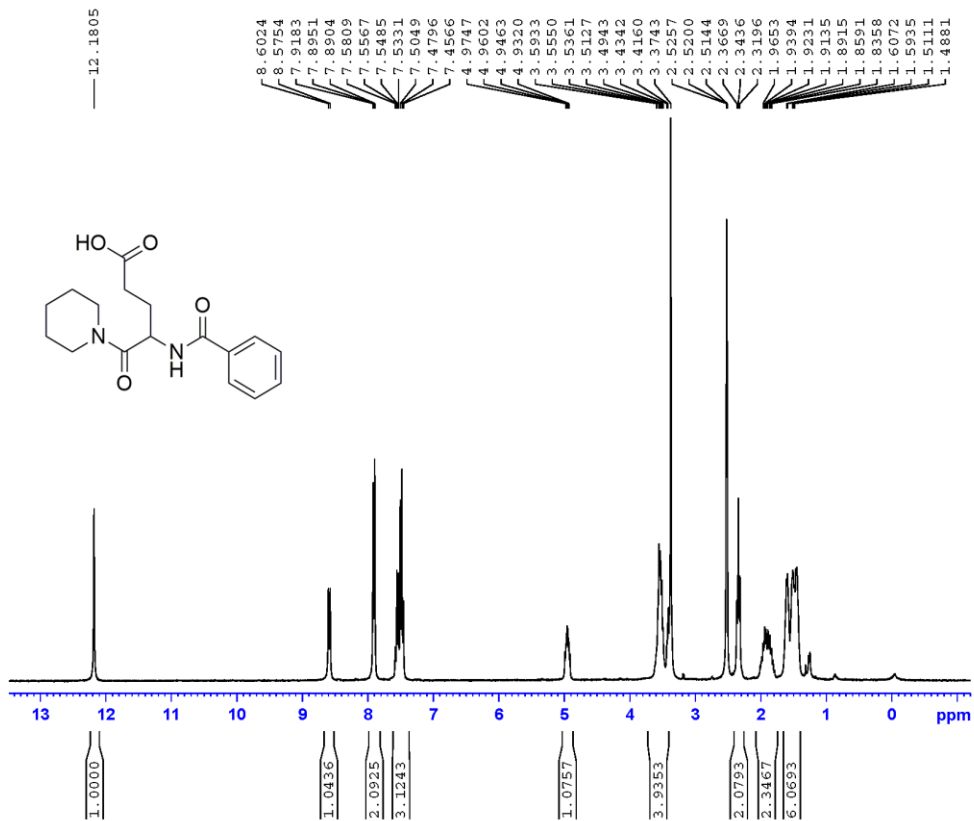

Supplementary Fig. 34 <sup>1</sup>H NMR (300 MHz, DMSO) of DDO-5713

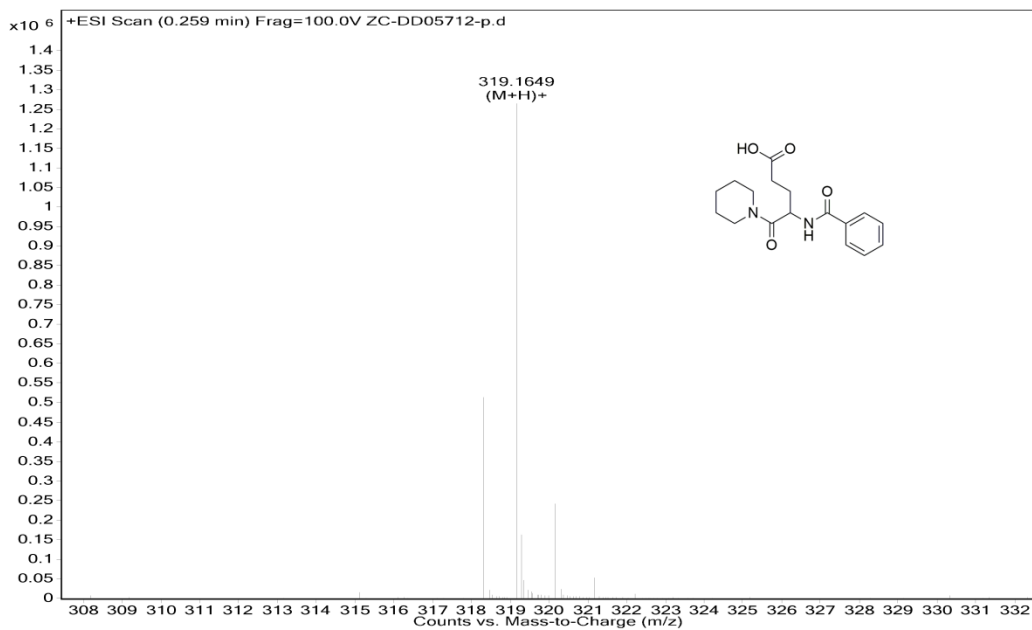

Supplementary Fig. 35 HR-MS (ESI) of DDO-5713

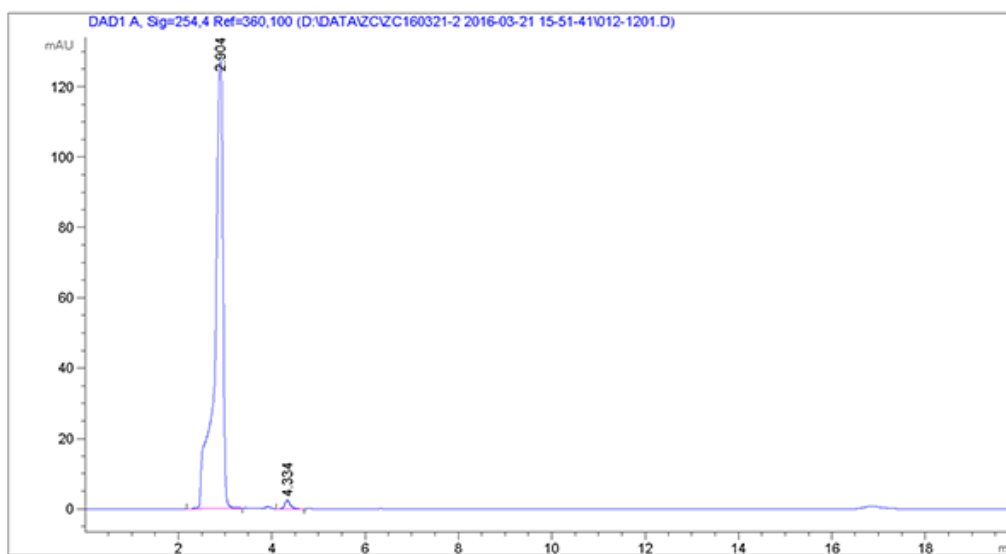

| Peak # | Retention time [min] | Type | Peak width [min] | Peak area [mAU*s] | Peak height [mAU] | Peak area % |
|--------|----------------------|------|------------------|-------------------|-------------------|-------------|
| 1      | 2.904                | BB   | 0.1849           | 1563.66064        | 127.64718         | 98.8265     |
| 2      | 4.334                | BB   | 0.1160           | 18.56741          | 2.40654           | 1.1735      |

Supplementary Fig. 36 HPLC of DDO-5713

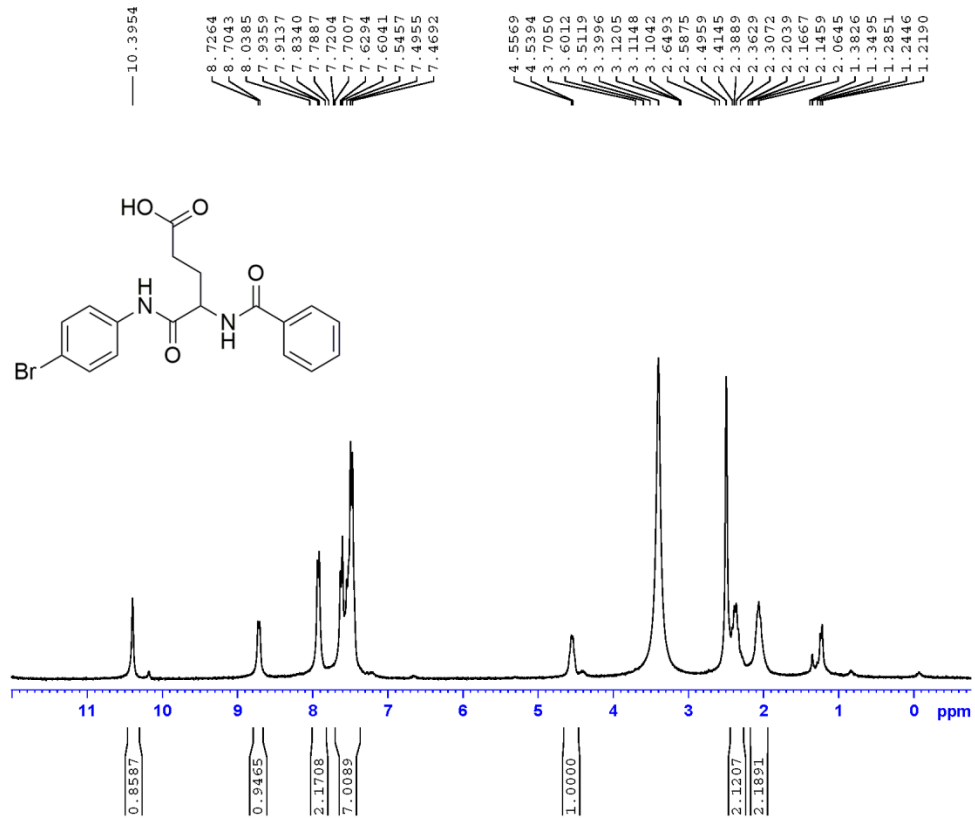

Supplementary Fig. 37 <sup>1</sup>H NMR (300 MHz, DMSO) of DDO-5714

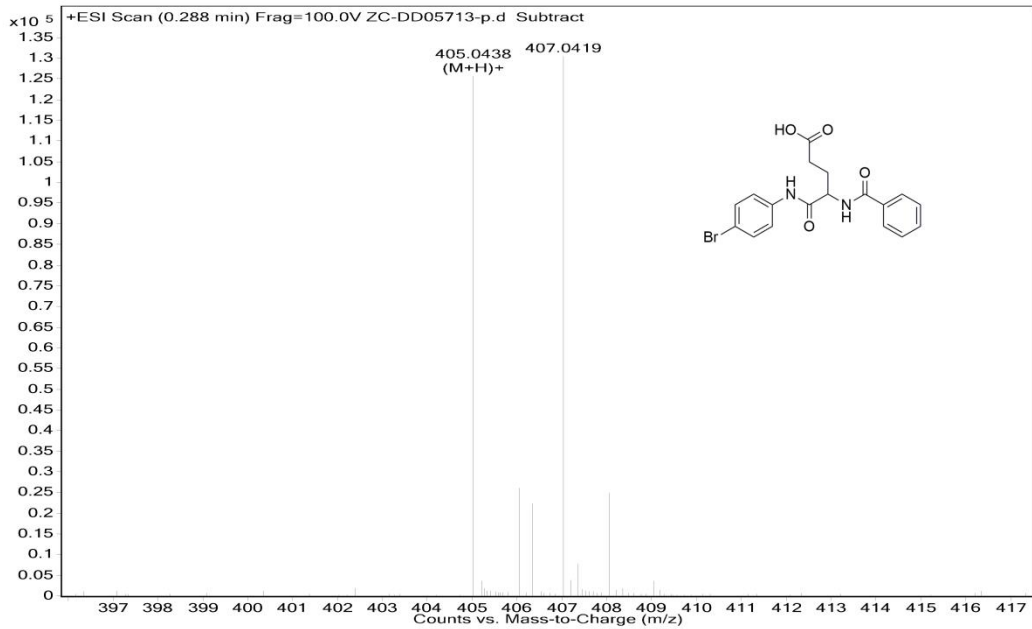

Supplementary Fig. 38 HR-MS (ESI) of DDO-5714



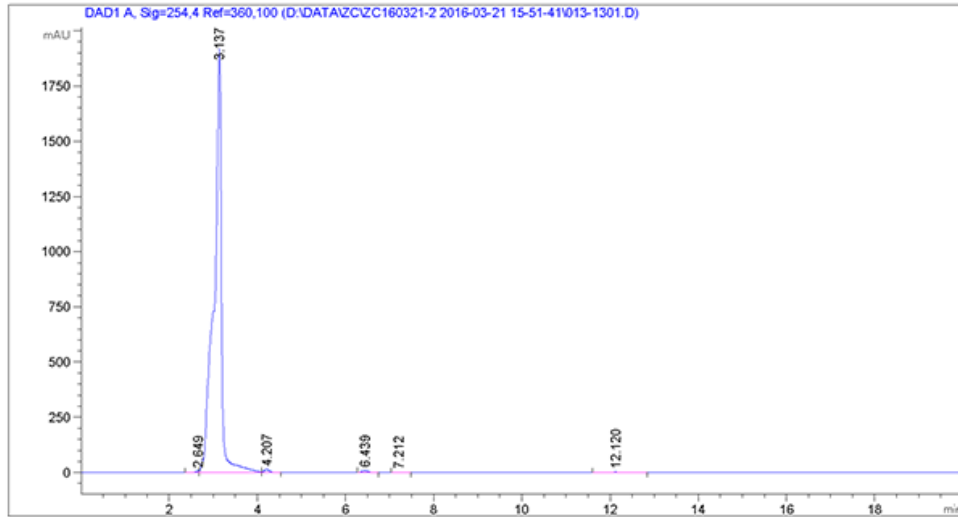

| Peak # | Retention time [min] | Type | Peak width [min] | Peak area [mAU*s] | Peak height [mAU] | Peak area % |
|--------|----------------------|------|------------------|-------------------|-------------------|-------------|
| 1      | 2.649                | BV   | 0.0693           | 25.55136          | 5.42314           | 0.1126      |
| 2      | 3.137                | VV   | 0.1604           | 2.24393e4         | 1919.11340        | 98.9243     |
| 3      | 4.207                | VB   | 0.1076           | 99.12284          | 13.83706          | 0.4370      |
| 4      | 6.439                | VB   | 0.1407           | 71.28300          | 7.79778           | 0.3143      |
| 5      | 7.212                | BB   | 0.1559           | 11.61020          | 1.14897           | 0.0512      |
| 6      | 12.120               | BB   | 0.2589           | 36.43829          | 2.15893           | 0.1606      |

Supplementary Fig. 39 HPLC of DDO-5714

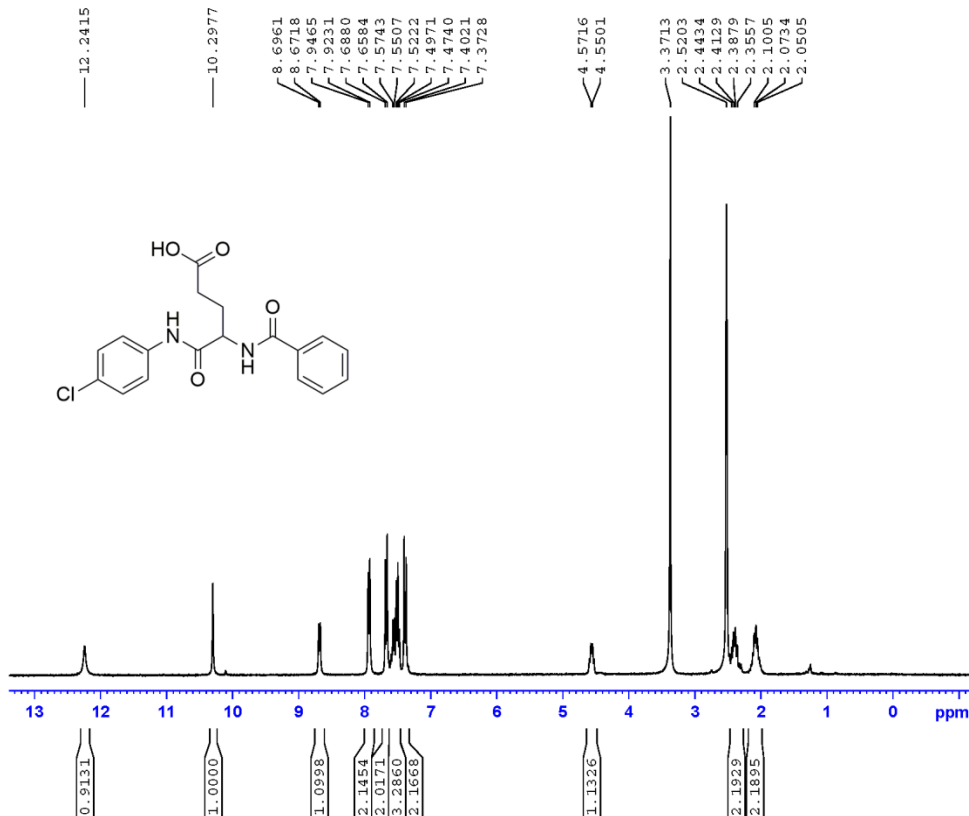

Supplementary Fig. 40 <sup>1</sup>H NMR (300 MHz, DMSO) of DDO-5715

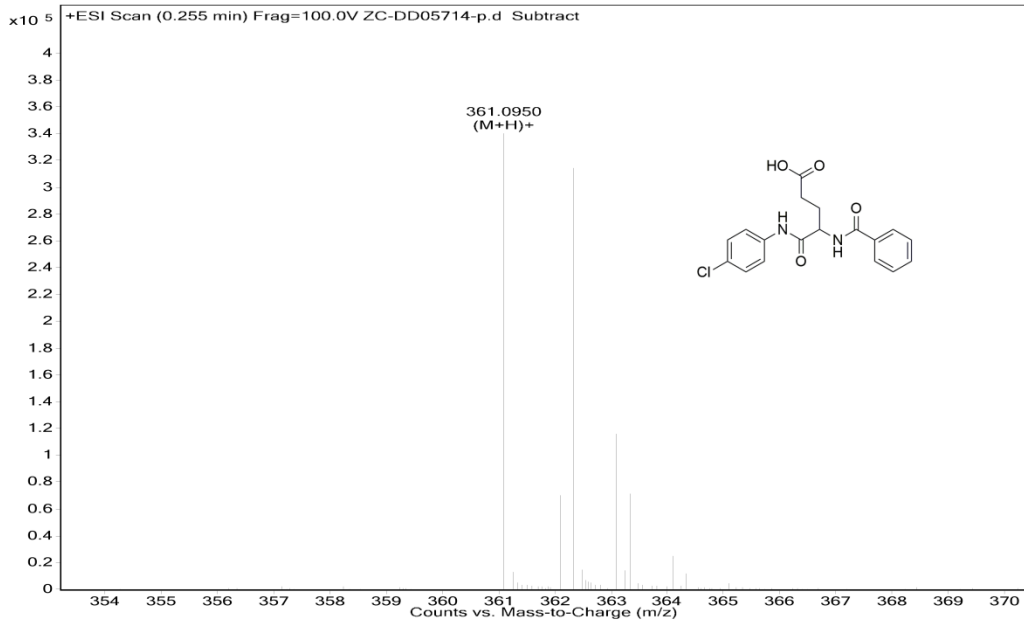

**Supplementary Fig. 41 HR-MS (ESI) of DDO-5715**

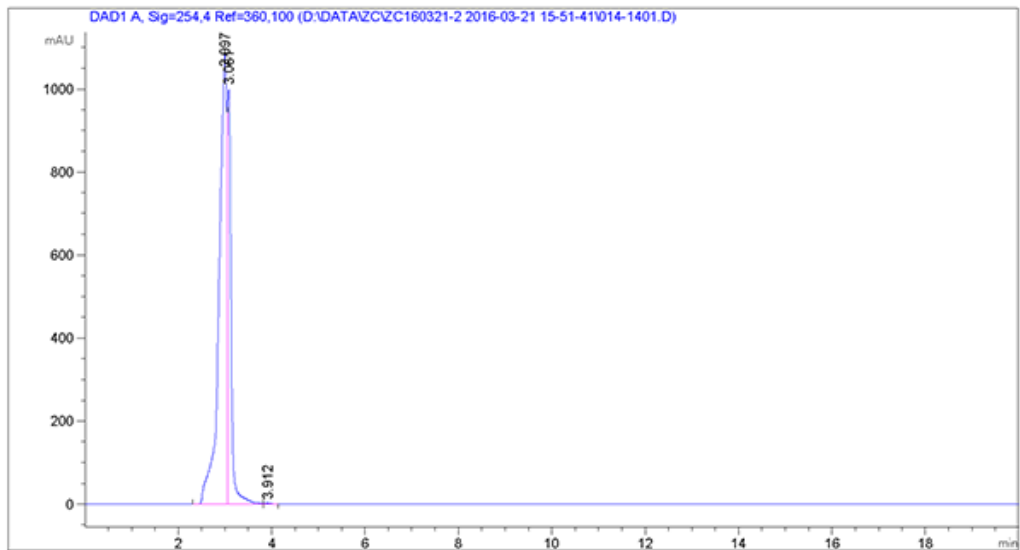

| Peak # | Retention time [min] | Type | Peak width [min] | Peak area [mAU*s] | Peak height [mAU] | Peak area % |
|--------|----------------------|------|------------------|-------------------|-------------------|-------------|
| 1      | 2.997                | BV   | 0.1589           | 1.23294e4         | 1081.98181        | 68.8860     |
| 2      | 3.081                | VV   | 0.0808           | 5554.44580        | 1000.61011        | 31.0334     |
| 3      | 3.912                | VB   | 0.1344           | 14.42400          | 1.58106           | 0.0806      |

**Supplementary Fig. 42 HPLC of DDO-5715**

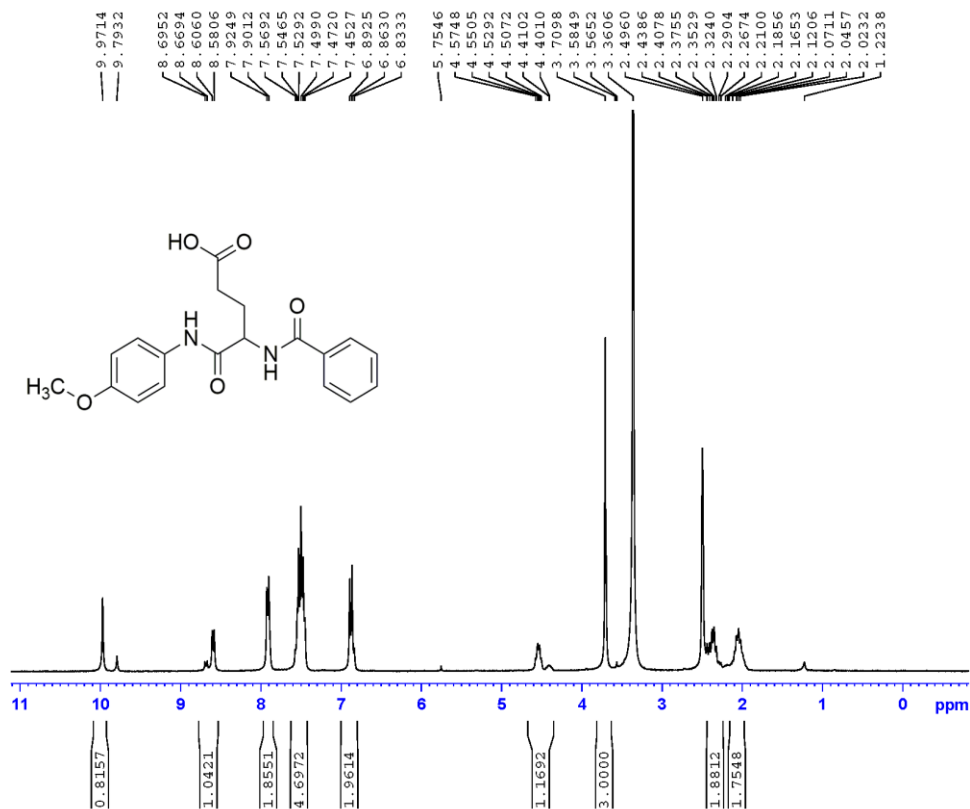

Supplementary Fig. 43 <sup>1</sup>H NMR (300 MHz, DMSO) of DDO-5716

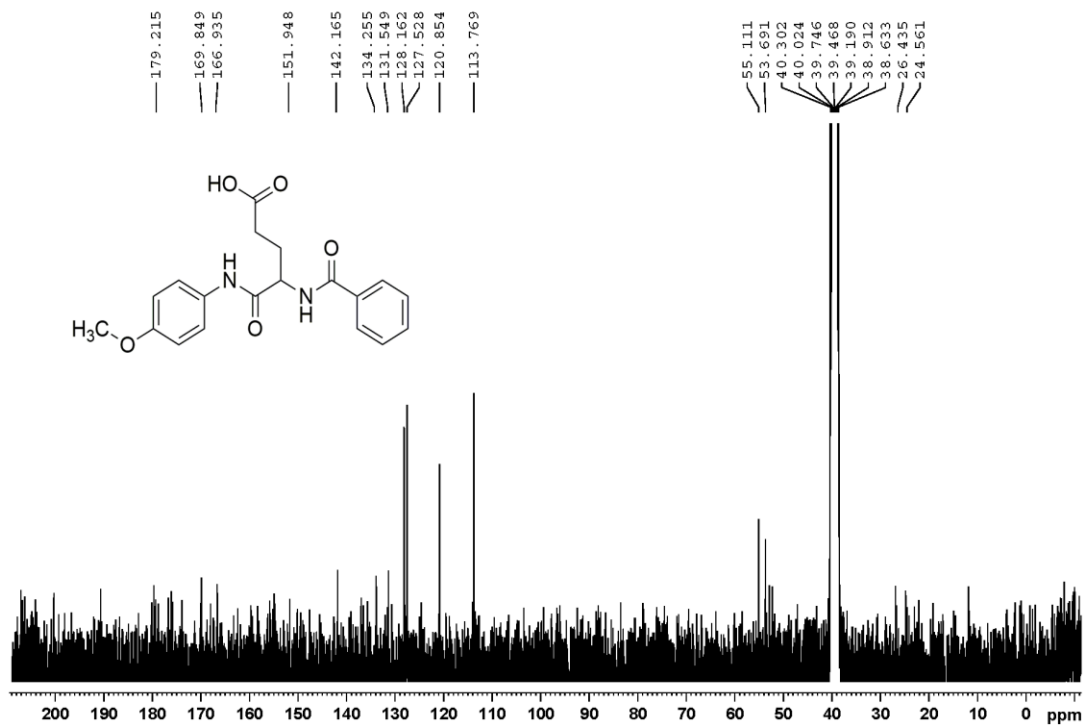

Supplementary Fig. 44 <sup>13</sup>C NMR (75 MHz, CDCl<sub>3</sub>) of DDO-5716

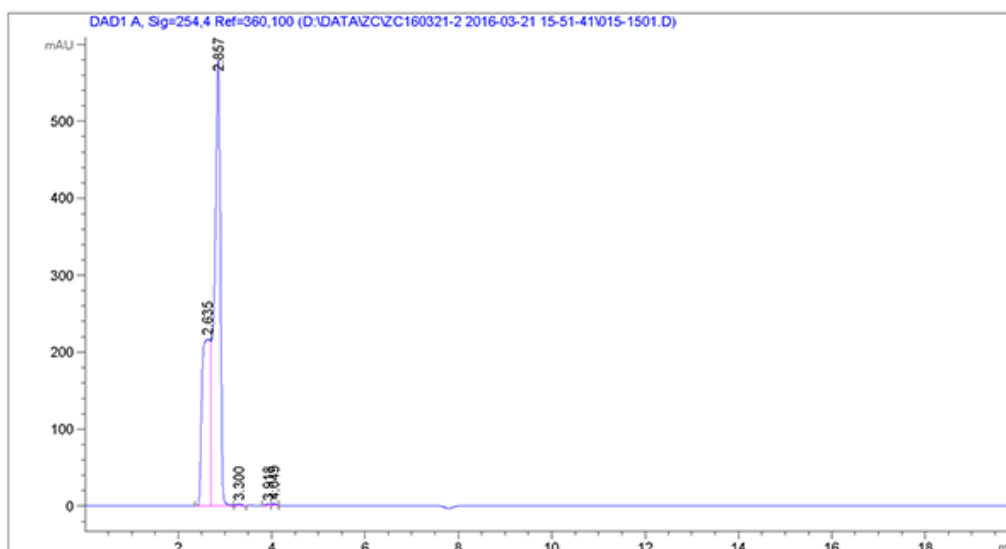

| Peak # | Retention time [min] | Type | Peak width [min] | Peak area [mAU*s] | Peak height [mAU] | Peak area % |
|--------|----------------------|------|------------------|-------------------|-------------------|-------------|
| 1      | 2.635                | BV   | 0.1962           | 2640.53662        | 216.59180         | 31.4362     |
| 2      | 2.857                | VV   | 0.1321           | 5672.61539        | 579.46503         | 67.5338     |
| 3      | 3.300                | VB   | 0.0912           | 30.50760          | 2.24722           | 0.3632      |
| 4      | 3.918                | BV   | 0.0924           | 26.45056          | 2.01758           | 0.3149      |
| 5      | 4.049                | VB   | 0.0952           | 29.55843          | 2.37090           | 0.3519      |

Supplementary Fig. 45 HPLC of DDO-5716

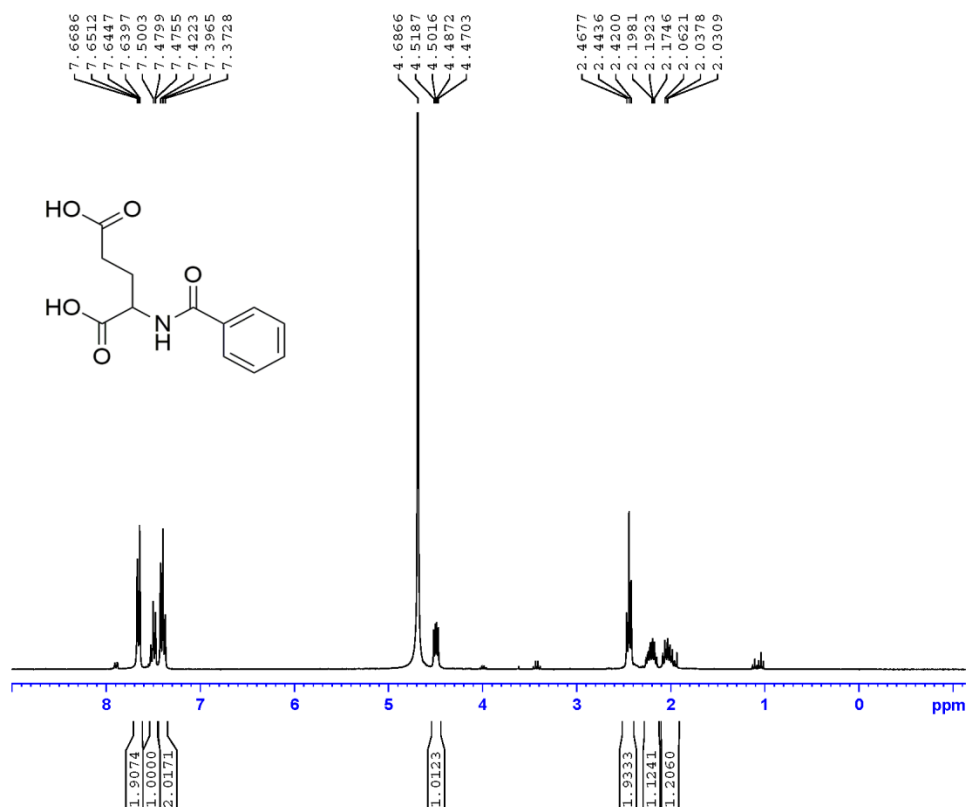

Supplementary Fig. 46 <sup>1</sup>H NMR (300 MHz, D<sub>2</sub>O) of DDO-5717

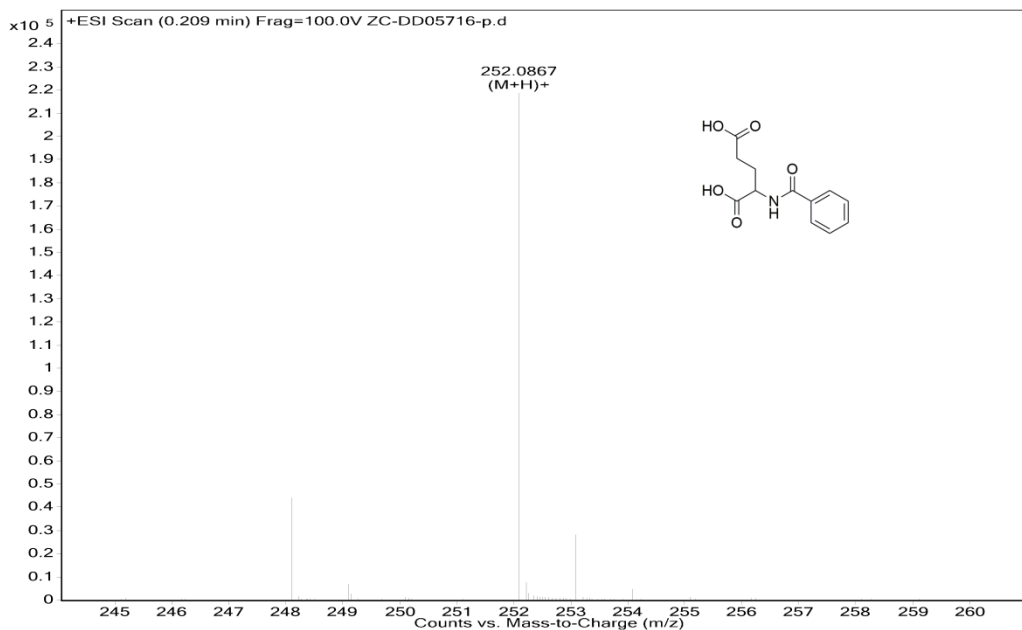

Supplementary Fig. 47 HR-MS (ESI) of DDO-5717

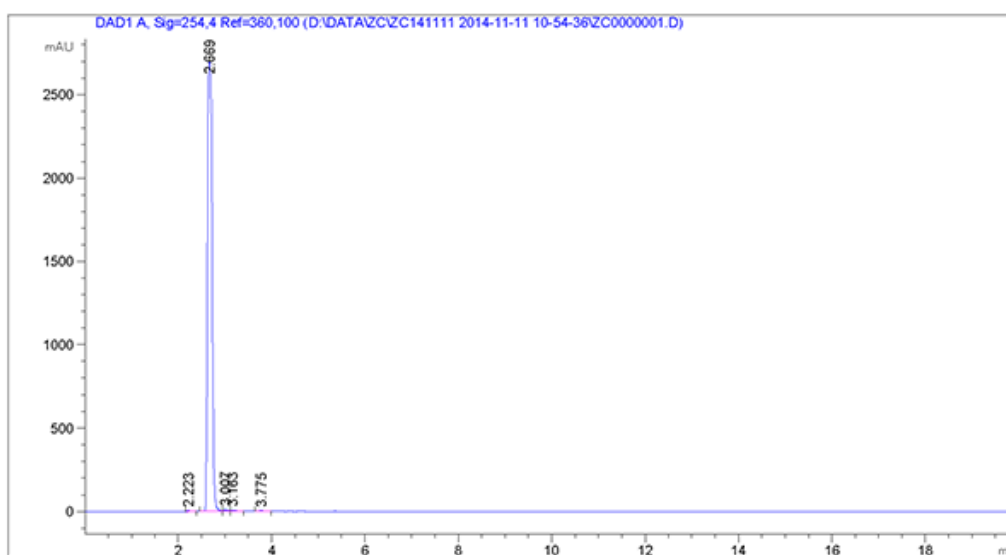

| Peak # | Retention time [min] | Type | Peak width [min] | Peak area [mAU*s] | Peak height [mAU] | Peak area % |
|--------|----------------------|------|------------------|-------------------|-------------------|-------------|
| 1      | 2.223                | BB   | 0.0698           | 15.27095          | 3.31248           | 0.0821      |
| 2      | 2.669                | BV   | 0.0958           | 1.84647e4         | 2700.99268        | 99.2665     |
| 3      | 3.007                | VV   | 0.0842           | 60.34696          | 10.03527          | 0.3244      |
| 4      | 3.163                | VB   | 0.0983           | 37.39946          | 5.43642           | 0.2011      |
| 5      | 3.775                | BV   | 0.0891           | 23.41782          | 3.95512           | 0.1259      |

Supplementary Fig. 48 HPLC of DDO-5717

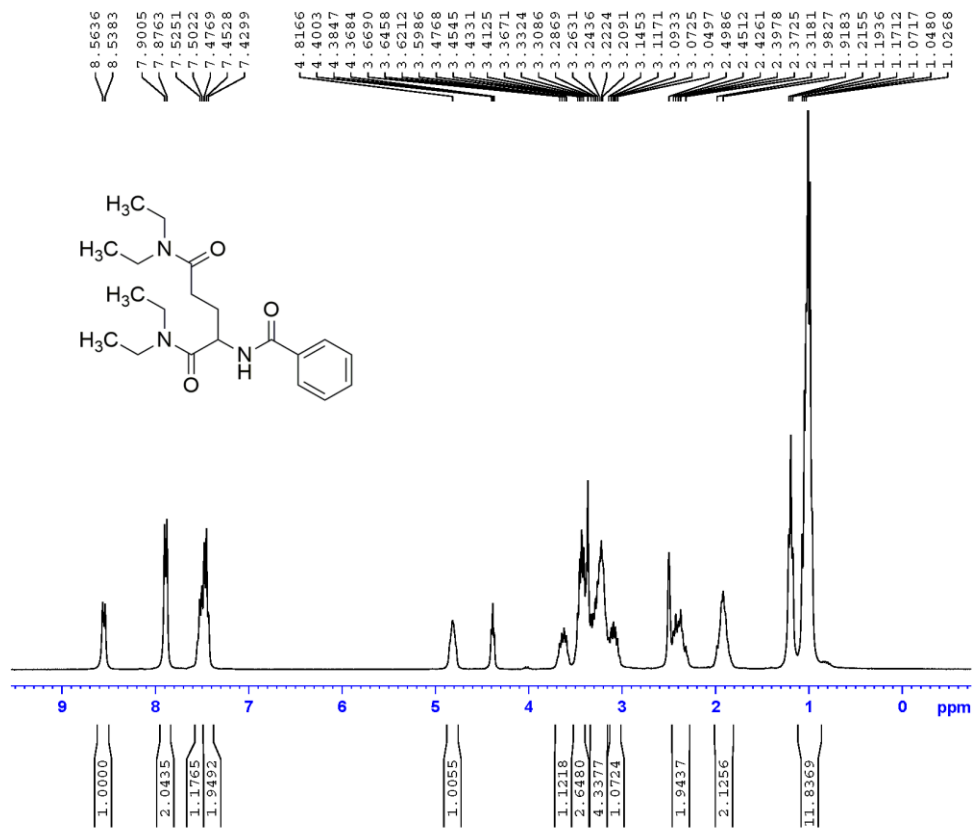

Supplementary Fig. 49 <sup>1</sup>H NMR (300 MHz, DMSO) of DDO-5718

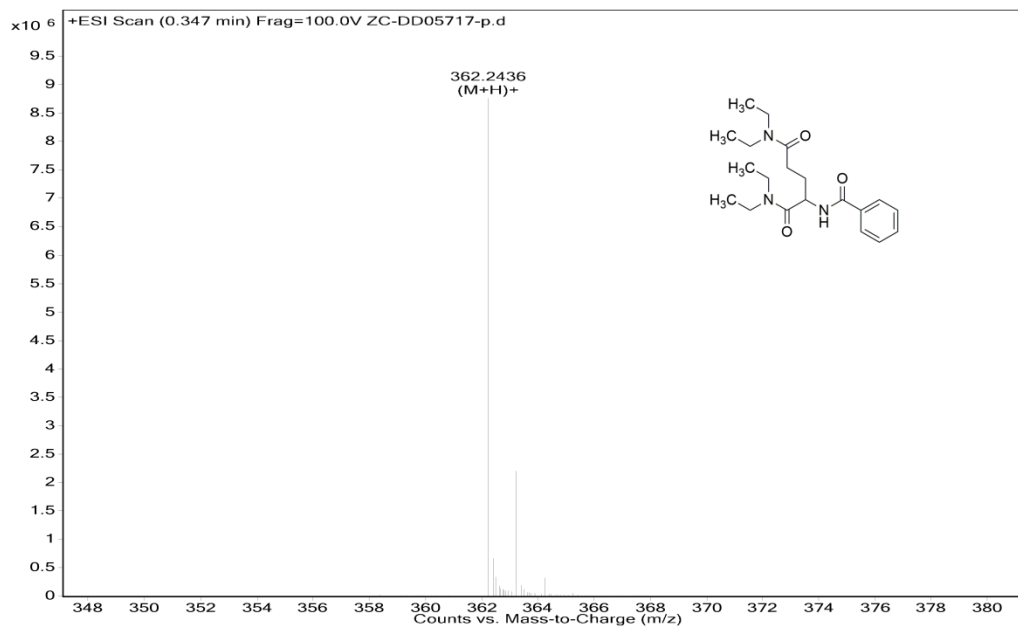

Supplementary Fig. 50 HR-MS (ESI) of DDO-5718

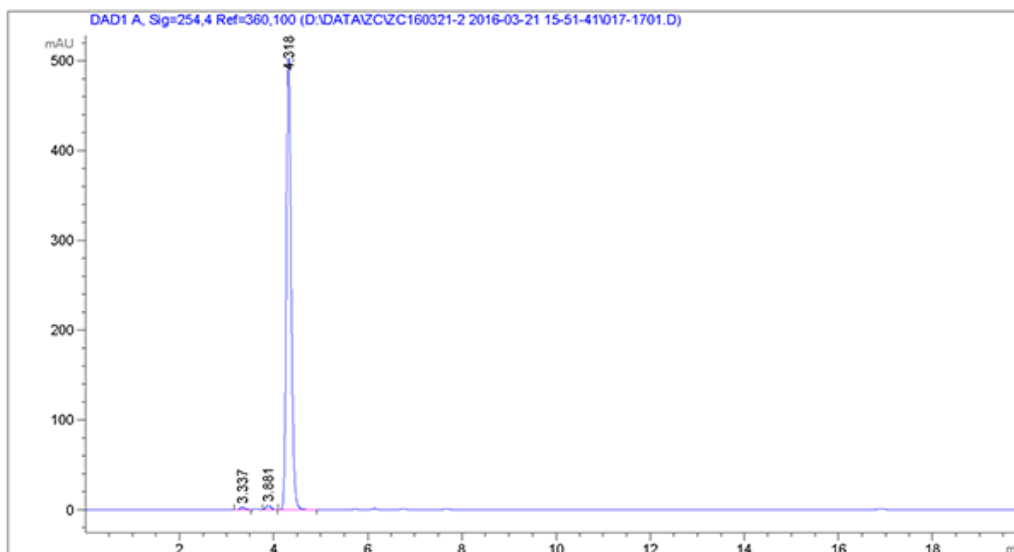

| Peak # | Retention time [min] | Type | Peak width [min] | Peak area [mAU*s] | Peak height [mAU] | Peak area % |
|--------|----------------------|------|------------------|-------------------|-------------------|-------------|
| 1      | 3.337                | BV   | 0.1044           | 19.07712          | 2.70076           | 0.5101      |
| 2      | 3.881                | VB   | 0.1075           | 24.76921          | 4.44964           | 0.6623      |
| 3      | 4.318                | BB   | 0.1097           | 3696.03212        | 502.51224         | 98.8276     |

Supplementary Fig. 51 HPLC of DDO-5718
